1 **Detection and functional resolution of soluble multimeric immune complexes**  
2 **by a comprehensive FcγR reporter cell panel**

3

4 Haizhang Chen<sup>1,2</sup>, Andrea Maul-Pavicic<sup>3,4</sup>, Martin Holzer<sup>5</sup>, Magdalena Huber<sup>1,2</sup>, Ulrich  
5 Salzer<sup>3</sup>, Nina Chevalier<sup>3</sup>, Reinhard E. Voll<sup>3,4</sup>, Hartmut Hengel<sup>1,2,\*</sup> & Philipp Kolb<sup>1,2,\*</sup>

6

7 <sup>1</sup>Institute of Virology, University Medical Center, Albert-Ludwigs-University Freiburg,  
8 Hermann-Herder-Str. 11, 79104 Freiburg, Germany

9 <sup>2</sup>Faculty of Medicine, Albert-Ludwigs-University Freiburg, 79104 Freiburg, Germany

10 <sup>3</sup>Department of Rheumatology and Clinical Immunology, Medical Center - University of  
11 Freiburg, Faculty of Medicine, University of Freiburg, Hugstetterstr. 55, 79106 Freiburg,  
12 Germany

13 <sup>4</sup>Center for Chronic Immunodeficiency (CCI), Medical Center-University of Freiburg, Faculty  
14 of Medicine, University of Freiburg, Breisacherstr. 115, 79106 Freiburg, Germany

15 <sup>5</sup>Institute for Pharmaceutical Sciences, Albert-Ludwigs-University Freiburg, Hermann-Herder-  
16 Str. 9, 79104 Freiburg, Germany

17

18 \*corresponding authors (Hartmut.hengel@uniklinik-freiburg.de)

19

20 **One Sentence Summary:** In this study we established a comprehensive FcγR reporter cell  
21 assay enabling the detection and quantification of soluble immune complexes generated in  
22 experimental and clinical settings.

23 **Abstract:** Fc-gamma receptor (Fc $\gamma$ R) activation by soluble IgG immune complexes (sICs)  
24 represents a major mechanism of inflammation in certain autoimmune diseases such as systemic  
25 lupus erythematosus (SLE). A robust and scalable test system allowing for the detection and  
26 quantification of sIC bioactivity is missing. Previously described Fc $\gamma$ R interaction assays are  
27 limited to certain Fc $\gamma$ Rs, lack scalability and flexibility, are not indicative of receptor activation  
28 or lack sensitivity towards sIC size. We developed a comprehensive reporter cell panel  
29 detecting individual activation of Fc $\gamma$ Rs from humans and the mouse. The reporter cell lines  
30 were integrated into an assay format that provides flexible read-outs enabling the quantification  
31 of sIC reactivity via ELISA or a fast detection using flow cytometry. This identified  
32 Fc $\gamma$ RIIA(H) and Fc $\gamma$ RIIIA as the most sIC-sensitive Fc $\gamma$ Rs in our test system. Applying the  
33 assay we demonstrate that sICs versus immobilized ICs are fundamentally different Fc $\gamma$ R-  
34 ligands with regard to Fc $\gamma$ R preference and signal strength. Reaching a detection limit in the  
35 very low nanomolar range, the assay proved also to be sensitive to sIC stoichiometry and size  
36 enabling for the first time a complete reproduction of the Heidelberger-Kendall precipitation  
37 curve in terms of immune receptor activation. Analyzing sera from SLE patients and mouse  
38 models of lupus and arthritis proved that sIC-dependent Fc $\gamma$ R activation has predictive  
39 capabilities regarding severity of SLE disease. The new methodology provides a sensitive,  
40 scalable and comprehensive tool to evaluate the size, amount and bioactivity of sICs in all  
41 settings.

42

### 43 **Introduction**

44 Immunoglobulin G (IgG) is the dominant immunoglobulin isotype in chronic infections and in  
45 various antibody-mediated autoimmune diseases. The multi-faceted effects of the IgG molecule  
46 rely both on the F(ab) regions, which recognize a specific antigenic determinant to form  
47 immune complexes (ICs), and the constant Fc region (Fc $\gamma$ ), which is detected by effector  
48 molecules like the Fc $\gamma$  receptors (Fc $\gamma$ Rs) found on most cells of the immune system or C1q of

49 the complement system. When IgG binds to its antigen ICs are formed, which, depending on  
50 the respective antigen, are either matrix/cell-bound or soluble (sICs). The composition of sICs  
51 is dependent on the number of epitopes recognized by IgG on a single antigen molecule and the  
52 ability of the antigen to form multimers. Fc $\gamma$ -Fc $\gamma$ R binding is necessary but not sufficient to  
53 activate Fc $\gamma$ Rs since physical receptor cross-linking is required for receptor triggering  
54 (Duchemin et al, 1994; Luo et al, 2010; Patel et al, 2019). IgG opsonized infected cells or  
55 microorganisms are readily able to cross-link Fc $\gamma$ Rs (Bruhns et al, 2009; Lux et al, 2013). This  
56 initiates various signalling pathways (Greenberg et al, 1994; Kiefer et al, 1998; Luo et al, 2010)  
57 which in turn regulate immune cell effector functions (Bournazos et al, 2017; Nimmerjahn &  
58 Ravetch, 2010). It is also suggested that sICs can dynamically tune Fc $\gamma$ R triggering, implying  
59 that changes in sIC size directly impact strength and duration of Fc $\gamma$ R responses (Lux et al,  
60 2013). However, the molecular requirements are largely unknown and a translation to  
61 bioactivity of the paradigmatic Heidelberger-Kendall precipitation curve, describing that sIC  
62 size depends on the antigen:antibody ratio, is so far missing (Heidelberger & Kendall, 1929;  
63 Heidelberger & Kendall, 1935).

64 Among all type I Fc $\gamma$ Rs, Fc $\gamma$ RIIB (CD32B) is the only inhibitory receptor, signalling via  
65 immunoreceptor tyrosine-based inhibitory motifs (ITIMs), while the activating receptors are  
66 associated with immunoreceptor tyrosine-based activation motifs (ITAMs). Another exception  
67 is Fc $\gamma$ RIIIB (CD16B), which is glycosylphosphatidylinositol (GPI)-anchored and lacks a  
68 signalling motif (Bruhns, 2012; Bruhns & Jonsson, 2015; Nimmerjahn & Ravetch, 2006;  
69 Nimmerjahn & Ravetch, 2008). Still, Fc $\gamma$ RIIIB is widely accepted to be a neutrophil activating  
70 receptor, e.g. by cooperating with other Fc $\gamma$ Rs such as Fc $\gamma$ RIIA (Vossebeld et al, 1997). Fc $\gamma$ RI  
71 (CD64) is the only high affinity Fc $\gamma$ R binding also to monomeric IgG, while all other Fc $\gamma$ Rs  
72 only efficiently bind to complexed, i.e. antigen-bound IgG (Bruhns, 2012; Bruhns & Jonsson,  
73 2015; Lu et al, 2018). Activation of Fc $\gamma$ Rs leads to a variety of cellular effector functions  
74 elicited by several immune cells such as natural killer (NK) cells via Fc $\gamma$ RIIC/Fc $\gamma$ RIIIA,

75 monocyte-derived cells via Fc $\gamma$ RI/Fc $\gamma$ RIIB/Fc $\gamma$ RIIIA, granulocytes via  
76 Fc $\gamma$ RI/Fc $\gamma$ RIIA/Fc $\gamma$ RIIIB, platelets via Fc $\gamma$ RIIA and B cells via Fc $\gamma$ RIIB. Consequently, Fc $\gamma$ Rs  
77 connect and regulate both the innate and adaptive branches of the immune system. Various  
78 factors have been shown to influence IC-dependent Fc $\gamma$ R activation profiles, including Fc $\gamma$ R-  
79 Fc $\gamma$  binding affinity and avidity (Koenderman, 2019), IgG subclass, glycosylation patterns and  
80 genetic polymorphism (Bruhns et al, 2009; Pincetic et al, 2014; Plomp et al, 2017; Vidarsson  
81 et al, 2014), stoichiometry of antigen-antibody-ratio (Berger et al, 1996; Lux et al, 2013; Pierson  
82 et al, 2007) and Fc $\gamma$ R clustering patterns (Patel et al, 2019). Specifically, Asn297-linked  
83 glycosylation patterns of the IgG Fc domain initiate either pro- or anti-inflammatory effector  
84 pathways by tuning the binding affinity to activating versus inhibitory Fc $\gamma$ Rs, respectively  
85 (Bohm et al, 2014). However, despite being explored in proof-of-concept studies, the functional  
86 consequences of these ligand features on a given Fc $\gamma$ R are still not fully understood. Therefore,  
87 there is an obvious need for an assay platform allowing for the systematic assessment of IC-  
88 mediated Fc $\gamma$ R activation.

89 sICs and immobilized ICs represent unequal and discrete stimuli for the immune system  
90 (Fossati et al, 2002; Granger et al, 2019). Soluble circulating ICs are commonly associated with  
91 certain chronic viral or bacterial infections (Wang & Ravetch, 2015; Yamada et al, 2015) and  
92 autoimmune diseases, such as systemic lupus erythematosus (SLE) or rheumatoid arthritis (RA)  
93 (Antes et al, 1991; Koffler et al, 1971; Zubler et al, 1976). When deposited and accumulating  
94 in tissues, sICs can cause local damage due to inflammatory responses, classified as type III  
95 hypersensitivity (Rajan, 2003). Compared with immobilized local ICs, which recruit immune  
96 cells causing tissue damage (Mayadas et al, 2009; Mulligan et al, 1991; Ward et al, 2016), sIC  
97 related disorders are characterized by systemic inflammation which is reflected by immune cell  
98 exhaustion and senescence (Bano et al, 2019; Chauhan, 2017; Tahir et al, 2015). In order to  
99 resolve sIC-dependent activation of Fc $\gamma$ Rs in greater detail, we developed a scalable reporter  
100 system suited for two high throughput readouts, capable of quantifying and distinguishing the

101 activation of single Fc $\gamma$ R<sub>s</sub>. As the assay is also sensitive to stoichiometry and sIC size, we were  
102 able to translate the Heidelberger-Kendall precipitation curve to Fc $\gamma$ R bioactivity. Compared to  
103 currently available ELISA assays detecting sICs by their affinity to C1q-CIC (circulating  
104 immune complexes) or C3d, the assay system presented below is strictly specific for IgG  
105 immune complexes and integrates sICs of all sizes into single Fc $\gamma$  receptor bioactivity.  
106 Applying reporter cell lines enables very high sensitivity in the low nanomolar range, as signals  
107 are biologically amplified compared to biochemical binding based read-outs. Finally, we  
108 applied the assay to a clinical setting, measuring sICs in sera from SLE patients. A reporter cell  
109 panel expressing murine Fc $\gamma$ R<sub>s</sub> revealed the detection of sICs in the serum of autoimmune-  
110 prone diseased mice in preclinical models of lupus and arthritis. Prospectively, this  
111 methodology could be instrumental as an experimental and clinical toolbox to unveil sIC-  
112 mediated Fc $\gamma$ R activation in various autoimmune or infectious diseases.

113

## 114 **Results**

### 115 *Experimental assay setup*

116 The assay used in this study was adapted from a previously described cell-based Fc $\gamma$ R activation  
117 test system designed to measure receptor activation in response to opsonized virus infected cells  
118 (Corrales-Aguilar et al, 2013; Kolb et al, 2021) and therapeutic Fc-fusion proteins (Lagasse et  
119 al, 2019). We refined the assay to enable selective detection of sICs and expanded the reporter  
120 cell line-up (Fc $\gamma$ RI: Acc# LT744984; Fc $\gamma$ RIIA (131R): Acc# M28697; Fc $\gamma$ RIIA(131H): Acc#  
121 XP\_011507593; Fc $\gamma$ RIIB/C: Acc# LT737639; Fc $\gamma$ RIIA(176V): Acc# LT737365;  
122 Fc $\gamma$ RIIB(176V): Acc# O75015). Ectodomains of Fc $\gamma$ RIIB and Fc $\gamma$ RIIC are identical. Second  
123 generation reporter cells were generated to improve stable expression of chimeric Fc $\gamma$ R<sub>s</sub>  
124 compared to the transfectants used in the original assay (Corrales-Aguilar et al, 2013). To this  
125 end, mouse BW5147 cells were transduced as described previously via lentiviral transduction  
126 (Corrales-Aguilar et al, 2013; Halenius et al, 2011; Van den Hoecke et al, 2017). Human Fc $\gamma$ R

127 expression on transduced cells after puromycin selection and two consecutive cell sorting steps  
128 was assessed by flow cytometry (Fig. 1A). Fc $\gamma$ R activation is measured by surface CD69  
129 expression after 4h of incubation using high throughput flow cytometry or by quantification of  
130 IL-2 secretion after 16 h of incubation using ELISA. Suspension of IgG or sICs in the liquid  
131 phase is enforced by pre-incubation of a 96 well ELISA microtiter plate with PBS/FCS blocking  
132 buffer (Fig. 1B). To this end, we compared graded concentrations of FCS in the blocking  
133 reagent and measured the threshold at which IgG was no longer adsorbed to the plate and stayed  
134 abundantly in solution. FCS supplementation to 1% (v/v) or higher is sufficient to keep IgG  
135 antibodies in solution. We then set out to test if immobilized IgG can be used as an operational  
136 surrogate for IgG-opsonized cells or immobilized ICs with regard to Fc $\gamma$ R activation as  
137 suggested previously (Tanaka et al, 2009). We found no qualitative difference in Fc $\gamma$ R  
138 activation between immobilized Rtx, immobilized ICs (Rtx + rec. CD20) or Rtx-opsonized  
139 293T-CD20 cells (Fig. 1C). In contrast, sICs formed by monomeric CD20 antigen (aa 141-188)  
140 and Rtx failed to activate Fc $\gamma$ Rs even at very high ligand concentrations. We concluded that  
141 Fc $\gamma$ R-crosslinking by sICs is only achieved by multivalent antigens but not dimeric ICs. Of  
142 particular note, to reliably and accurately differentiate between strictly soluble and immobilized  
143 including aggregated triggers using this assay, reagents for the generation of synthetic ICs  
144 needed to be of therapy-grade purity. The assay setup is depicted in Fig. 1D.

145

#### 146 *Detection of human Fc $\gamma$ R activation by multimeric sICs*

147 Next, we generated synthetic sICs from recombinant ultrapure molecules to evaluate the assay.  
148 We aimed to avoid the use non-human molecules, misfolded IgG aggregates or IgG-IgG  
149 complexes to generate a most native and defined ligand. To date, there are still few  
150 commercially available human IgG-antigen pairs that meet both the above mentioned high  
151 grade purity requirements while also consisting of at least two antigen monomers. In order to  
152 meet these stipulations we focused on three pairs of multivalent antigens and their respective

153 mAbs that were available in required amounts enabling large-scale titration experiments;  
154 trimeric rhTNF $\alpha$ :IgG1 infliximab (TNF $\alpha$ :Ifx), dimeric rhVEGFA: IgG1 bevacizumab  
155 (VEGFA/Bvz) and dimeric rhIL-5: IgG1 mepolizumab (IL-5/Mpz). As lymphocytes express  
156 TNF $\alpha$ -receptors I and II while not expressing receptors for IL-5 or VEGFA, we tested whether  
157 the mouse lymphocyte derived BW5147 thymoma reporter cell line is sensitive to high  
158 concentrations of rhTNF $\alpha$ . Toxicity testing revealed that even high concentrations of up to  
159 76.75 nM rhTNF $\alpha$  did not affect viability of reporter cells (Fig. S1). Next, we measured the  
160 dose-dependent activation of human Fc $\gamma$ R<sub>s</sub> comparing immobilized IgG to sICs (TNF $\alpha$ :Ifx)  
161 using the full Fc $\gamma$ R reporter cell panel (Fig. 2). Soluble antigen or mAb alone served as negative  
162 controls showing no background activation even at high concentrations. Immobilized rituximab  
163 (Rtx, human IgG1) and immobilized Fc $\gamma$ R-specific mouse mAbs served as positive controls for  
164 inter-experimental reference. All Fc $\gamma$ R<sub>s</sub> were activated by immobilized IgG. Only Fc $\gamma$ RI failed  
165 to respond when reporter cells were incubated with sICs. Both the IL-2 ELISA as well as the  
166 CD69 expression read-out gave comparable results. Further, using an IL-2 standard, we were  
167 able to quantify Fc $\gamma$ R activation (right y-axis). This revealed that the reporter cell lines differ  
168 regarding reactivity which did not correlate with receptor expression. Although the low signals  
169 for Fc $\gamma$ RI might be linked to receptor expression, responsiveness was markedly lower compared  
170 to other reporter cell lines (Fig. 1A). Attempts to increase and equalize receptor expression by  
171 repeated cell sorting steps failed, indicating that individual receptors only tolerate limited  
172 molecule densities on the reporter cell surfaces.

173

#### 174 *Evaluation of human Fc $\gamma$ R activation by multimeric sICs*

175 The assay proved to be sensitive to sICs in the nanomolar range. Regarding immobilized IgG,  
176 the detection limit was between 1 to 3 nM. sICs were detected with the following limits  
177 regarding the IL-2 readout: Fc $\gamma$ RI – no detection; Fc $\gamma$ RIIA(R) – 3 nM; Fc $\gamma$ RIIA(H) – 0.2 nM;  
178 Fc $\gamma$ RIIB/C – 3 nM; Fc $\gamma$ RIIIA – 0.2 nM; Fc $\gamma$ RIIIB - 25 nM. We observed that sICs and

179 immobilized ICs induce largely different signal strength in individual reporter cell lines. FcγRI  
180 and FcγRIIIB were more efficiently activated by immobilized IgG compared to sICs.  
181 Conversely, FcγRIIA(H) and FcγRIIIA were more efficiently activated by sICs. FcγRIIB/C  
182 showed discrepant results when comparing the IL-2 read-out (16 h) with the CD69 read-out (4  
183 h). Here, it seems that a longer activation leads to a stronger signal on immobilized IgG, while  
184 shorter activation slightly favours sIC reactivity. FcγRII(R) looked similar to FcγRIIB/C with  
185 a slightly higher response to sICs at low stimulant concentrations. Nevertheless, the response  
186 to immobilized IgG was higher for both read-outs at higher concentrations. FcγRIIA(H) and  
187 FcγRIIIA proved to be the most sensitive towards sICs stimulation. Notably, the reported  
188 superior interactivity of sICs with FcγRII (H) over FcγRII (R) (Shashidharamurthy et al, 2009)  
189 was not only confirmed using our assay but we also show that this difference is limited to sIC  
190 reactivity and is not seen in immobilized IC reactivity (Fig. 2). Additionally, we measured the  
191 response of select reporter cell lines towards sICs of different composition (VEGFA/Bvz and  
192 IL-5/Mpz). As these sICs incorporate dimeric antigens, we tested if reporter responses were  
193 still comparable (Fig. S2). We observed that responses to sICs were generally lower for  
194 FcγRIIA(R) but comparable for FcγRI, FcγRIIB/C and FcγRIIIA. Of note, FcγRI showed slight  
195 reactivity towards VEGFA/Bvz sICs. Based on the universal transmembrane and cytosolic part  
196 of the FcγR chimeras in our assay we concluded that FcγR ectodomains are intrinsically able  
197 to differentiate between different conformations of sICs and immobilized monomeric IgG  
198 ligands. To validate the data generated by the reporter assay, we determined FcγRIIIA  
199 activation using primary human NK cells isolated from PBMCs of three healthy donors. We  
200 chose NK cells as they mostly express only one type of FcγR similar to the reporter system and  
201 used IL-5/Mpz sICs as NK cells do not respond to IL-5. Measuring a panel of activation markers  
202 and cytokine responses by flow cytometry, we observed a differential activation pattern  
203 depending on ICs being soluble or immobilized at equal molarity (Fig. 3A). While MIP1-β  
204 responses were comparable between the two triggers, degranulation (CD107a) and TNFα



205 responses showed a trend towards lower activation by sICs compared to immobilized IgG  
206 (Mpz). Strikingly, IFN $\gamma$  responses were significantly weaker when NK cells were incubated  
207 with sICs compared to immobilized IgG. Next, in order to confirm this to be due to specific  
208 activation of Fc $\gamma$ RIIA, we changed the sIC setup by generating reverse-orientation sICs  
209 consisting of human Fc $\gamma$ R-specific mouse mAbs and goat-anti-mouse IgG F(ab)<sub>2</sub> fragments  
210 (Fig. S3A). NK cell activation by reverse sICs was compared to NK cell activation by  
211 immobilized Fc $\gamma$ R specific mAbs. This confirmed our previous observations. As in roughly  
212 10% of the population NK cells express Fc $\gamma$ RIIC (Anania et al, 2019; Breunis et al, 2008; Lisi  
213 et al, 2011; Metes et al, 1998), we also tested reverse sIC activation using an Fc $\gamma$ RII specific  
214 mAb. As we did not observe an Fc $\gamma$ RII-mediated response, we conclude that Fc $\gamma$ RIIC  
215 expression did not play a role in our experiments (Fig. S3B). Importantly, these experiments  
216 validate that all our experimentally synthesized sICs readily activate primary NK cells and  
217 induce immunological effector functions.

218 Next, primary neutrophils isolated from whole blood samples of four individual donors were  
219 analysed, measuring upregulation of CD11B, CD66B and shedding of L-selectin as markers of  
220 immune complex mediated adhesion and activation (Ilton et al, 1999; Khawaja et al, 2019; Lard  
221 et al, 1999; Zarbock & Ley, 2009) (Fig. 3B). Again, immobilized IgG and sICs activated  
222 primary neutrophils with different efficiency. While both, sICs and immobilized IgG, strongly  
223 induced the shedding of L-selectin, the upregulation of CD11B and CD66B showed a tendency  
224 towards lower activation by sICs compared to immobilized IgG. As neutrophils express both  
225 Fc $\gamma$ RIIA and Fc $\gamma$ RIIIB, we also individually activated these receptors on neutrophils using  
226 immobilized Fc $\gamma$ R-specific mAbs. This revealed that neutrophil activation by Fc $\gamma$ Rs is mostly  
227 driven by Fc $\gamma$ RIIIB. In light of our previous tests (Fig. 2), this explains the reduced activation  
228 by sICs. Taken together, we conclude that primary cells differentiate between opsonized targets  
229 and sICs via inherent features of individual Fc $\gamma$ Rs as well as by the co-expression of Fc $\gamma$ Rs  
230 with different sensitivity towards sICs.

231

232 *Measurement of FcγR activation in response to the molecular size of sICs*

233 We observed that the dimeric CD20:Rtx molecule complex completely failed to trigger FcγR  
234 activation (Fig. 1C) while potentially larger sICs, based on multimeric antigens, showed an  
235 efficient dose-dependent FcγR activation (Fig. 2, S2). In order to determine whether FcγR  
236 signalling responds to changes in sIC size, we cross-titrated amounts of antibody (mAb,  
237 infliximab, Ifx) and antigen (Ag, rhTNFα). Specifically, the reporter cells were incubated with  
238 sICs of varying mAb:Ag ratio by fixing one parameter and titrating the other. According to the  
239 Heidelberger-Kendall precipitation curve (Heidelberger & Kendall, 1929), sIC size depends on  
240 the mAb:Ag ratio. sICs of varying sizes result from an excess of either antigen or antibody,  
241 leading to the formation of smaller complexes compared to the large molecular complexes  
242 formed at around equal molarity. Presumed changes in sIC size were quantified using  
243 asymmetrical flow-field flow fractionation (AF4) (Fig. 4A and Table S1). Fig. S4 shows a  
244 complete run of an exemplary analysis. Af4 analysis revealed a sIC mean molecular weight of  
245 approximately 2130 kDa at a 1:3 ratio (Ifx/TNF-α) with sICs getting smaller with increasing  
246 excess of either antigen or antibody, recapitulating a Heidelberger-Kendall-like curve.  
247 Incubation of the FcγR reporter cells with sICs of varying size indeed shows that the assay is  
248 highly sensitive to changes in sIC size (Fig. 4B). Accordingly, FcγRs showed the strongest  
249 responses at mAb:Ag ratios of approximately 1:3. Next, we validated the accuracy of our  
250 reporter cell data by subjecting primary human NK cells to the same variation of mAb:Ag  
251 stoichiometry. NK cells from three individual donors were measured for MIP1-β upregulation  
252 in response to synthetic sICs of varying size and composition (Fig. 4C). Indeed, primary NK  
253 cells equally responded to sIC size at the same nanomolar range of stimulating ligand,  
254 confirming that the reporter system accurately measures immune cell responses to sICs.  
255 Convincingly, NK cell responses to sICs generated from trimeric antigen (TNFα) peaked at a  
256 different mAb:Ag ratio compared to NK cell responses to sICs generated from dimeric antigens

257 (IL-5 and VEGFA). TNF $\alpha$  and VEGFA contribute to the activation of resting NK cells, thus  
258 leading to higher MIP1- $\beta$  positivity when NK cells are incubated in the presence of excess  
259 antigen. As NK cells do not express IL-5 receptor, this effect is not observed in the presence of  
260 excess IL-5. The data reveal a direct correlation between sIC dimension and effector responses.  
261 Conversely, when changing antibody concentrations using fixed amounts of antigen, a  
262 consistent reduction of NK cell activation is observed in the presence of excess IgG for all three  
263 mAb:Ag pairs.

264

### 265 *Quantification of sIC bioactivity in sera of SLE patients*

266 In order to apply the assay to a clinically relevant setting associated with the occurrence of sICs,  
267 we measured circulating sICs present in the serum of SLE patients with varying disease activity.  
268 Sera from 4 healthy donors and 25 SLE patients were investigated for Fc $\gamma$ RIIIA and Fc $\gamma$ RIIB/C  
269 activation to compare an activating and an inhibitory receptor. Reporter cells readily secreted  
270 mIL-2 in response to patient sera in a dose-dependent manner (Fig. 5A), which was not the case  
271 when sera from healthy controls were tested. We confirm that Fc $\gamma$ RIIIA and Fc $\gamma$ RIIB/C  
272 activation depends on the presence of serum sICs by comparing the bioactivity of patient serum  
273 before and after polyethylene glycol (PEG) precipitation which is known to deplete sICs (Lux  
274 et al, 2013) (Fig. 5B). Next, we calculated the area under the curve (AUC) values for all 25 SLE  
275 patient titrations and normalized them to the AUC values measured for healthy individuals. The  
276 resulting index values were then correlated with established biomarkers of SLE disease activity,  
277 being anti-dsDNA titers ( $\alpha$ -dsDNA) and concentrations of the complement cleavage product  
278 C3d (Fig. 5C). We observed a significant correlation between our Fc $\gamma$ RIIIA activation index  
279 values and both disease activity markers ( $p=0.0465$  and  $p=0.0052$ , respectively). Fc $\gamma$ RIIB/C  
280 activation showed no significant correlation with either biomarker. We assume these  
281 interrelations may be due to the influence of IgG sialylation found to be reduced in active SLE  
282 (Vuckovic et al, 2015). Generally, de-sialylation of IgG leads to stronger binding by the

283 activating receptors Fc $\gamma$ RI, Fc $\gamma$ RIIA and Fc $\gamma$ RIII while it reduces the binding affinity of the  
284 inhibitory Fc $\gamma$ RIIB (Kaneko et al, 2006). In practice, our assay allows the detection and  
285 quantification of clinically relevant sICs in sera from SLE patients as shown here or in synovial  
286 fluid of rheumatoid arthritis patients (Zhao et al, 2021).

287

### 288 *Assay application to in vivo mouse models of lupus and arthritis*

289 BW5147 reporter cells stably expressing chimeric mouse as well as rhesus macaque Fc $\gamma$ Rs have  
290 already been generated using the here described methodology (Kolb et al, 2019; Van den  
291 Hoecke et al, 2017). Next we aimed to translate the assay to clinically relevant mouse models.  
292 Fc $\gamma$ R reporter cells expressing chimeric mouse Fc $\gamma$ Rs were incubated with sera from lupus  
293 (NZB/WF1)(Dubois et al, 1966) or arthritis (K/BxN)(Kouskoff et al, 1996) mice with  
294 symptomatic disease. We chose to determine the stimulation of the activating receptors,  
295 mFc $\gamma$ RIII and mFc $\gamma$ RIV. Incubation with synthetic sICs generated from rhTNF $\alpha$  and mouse-  
296 anti-hTNF $\alpha$  IgG1 showed both of the reporters to be equally responsive to sICs (Fig. 6A).  
297 Parental BW5147 cells expressing no Fc $\gamma$ Rs served as a control. The sera of three mice per  
298 group were analysed and compared to sera from wildtype C57BL/6 mice, which served as a  
299 healthy control. C57BL/6 mice were chosen, as K/BxN or NZB/WF1 mice show temporal  
300 variability in disease onset and presymptomatic phase. We consistently detected mFc $\gamma$ R  
301 activation by sera from K/BxN or NZB/WF1 but not healthy C57BL/6 mice (Fig. 6B). While  
302 the mFc $\gamma$ RIII responses were generally high and similar between K/BxN and NZB/WF1 mice,  
303 mFc $\gamma$ RIV responsiveness tended to be lower and individually more variable. Altogether, the  
304 assay enables the reliable detection of sICs in sera of mice with immune-complex mediated  
305 diseases making it a promising novel research tool to study the role of sIC formation and Fc $\gamma$ R  
306 activation in preclinical mouse models.

307

## 308 **Discussion**

309 In this study we established, validated and applied a new assay system that is able to selectively  
310 detect soluble multimeric immune complexes as discrete ligands of FcγRs. Our system is  
311 sensitive to the size, concentration and composition of sICs. The assay is scalable and supports  
312 measurement with human and mouse FcγRs. It provides two readouts suitable for high-  
313 throughput analysis: fast CD69 surface expression and quantifiable IL-2 secretion.

314

315 *A novel assay for the quantification of individual FcγR activation by experimental and clinical*  
316 *sICs.*

317 Our methodology provides a comprehensive system, supporting the assessment of essentially  
318 all FcγRs, which presents an advantage over previously developed sIC detection and FcγR  
319 activation assays (Aoyama et al, 2019; Cheng et al, 2014; Hsieh et al, 2017; Stopforth et al,  
320 2018; Szittner et al, 2016; Tada et al, 2014). In contrast to currently available commercial assays  
321 detecting sICs by C1q-CIC or C3d ELISA in the micromolar range, our assay measures overall  
322 sIC bioactivity in the nanomolar range and has a sole specificity for IgG sICs. The new approach  
323 presents with hands on technical advances as it allows for the measurement of small or large  
324 amounts of samples by a relatively simple *in vitro* assay with high-throughput potential.  
325 Favourably, BW5147 reporter cells are largely inert to human cytokines, which provides a key  
326 advantage to measure their responsiveness after contact with human samples. Our pilot study  
327 demonstrates that sIC-mediated FcγRIIIA activation correlates with conventional SLE disease  
328 markers. This is of great value as a recent analysis shows that circulating sICs and IL-6 can  
329 predict SLE activity with the higher accuracy compared to conventional clinical SLE  
330 biomarkers (Thanadetsuntorn et al, 2018). However, circulating immune complexes in this  
331 study were determined using a commercial C1q-binding ELISA, lacking information on  
332 immune cell bioactivity of the measured sICs. Our assay should therefore be explored as an  
333 addition to the clinician's toolbox which may allow better disease management. Due to the  
334 scalability and high-throughput readouts, the assay can also be of use for larger prospective

335 clinical studies in patients with autoimmune diseases such as SLE or rheumatoid arthritis, where  
336 circulating sICs have long been shown to crucially contribute to tissue damage and disease  
337 manifestations (Koffler et al, 1971; Levinsky, 1978; Levinsky et al, 1977; Nydegger & Davis,  
338 1980; Zubler et al, 1976). Disease-associated, endogenous sICs can also be formed from  
339 multimeric viral and bacterial structural proteins generated during infection (Briant et al, 1996;  
340 Oh et al, 1992; Vuitton et al, 2020), where circulating sICs strongly impact pathogenesis  
341 (Madalinski et al, 1991; Wang & Ravetch, 2015).

342

### 343 *Dynamic sIC size measurement and monitoring of bioactivity in sIC-associated diseases*

344 The new sIC approach allowed for a simultaneous functional and biophysical assessment of the  
345 paradigmatic Heidelberger-Kendall precipitation curve (Heidelberger & Kendall, 1929;  
346 Heidelberger & Kendall, 1935). While previous work already revealed that large and small sICs  
347 differentially impact IL-6 production in PBMCs (Lux et al, 2013), the dynamics of FcγR  
348 activation resulting from constant changes in sIC size have not been explored systematically  
349 and lacked resolution of defined FcγR types. We analyzed synthetic sICs formed by highly pure  
350 recombinant components via AF4. Our data document that sIC size is indeed governed by  
351 antibody:antigen ratios covering a wide range of sizes up to several megadaltons. In the  
352 presence of increasing amounts of antibody or antigen deviating from an optimal antibody:ratio,  
353 sIC size steadily decreases. Further, by the measurement of FcγR activation we now translate  
354 physical sIC size directly to a simple but precise biological read-out. In doing so, we show that  
355 sIC size essentially tunes FcγR activation on and off. Thus, our new test system can not only  
356 contribute to the functional detection and quantification of clinically relevant sICs but also  
357 provides a starting point on how to avoid pathological consequences by influencing the sIC  
358 size, for example by administering and monitoring of therapeutic antibodies or recombinant  
359 antigens in controlled amounts, thus becoming relevant in clinical pharmacokinetics.

360

361 *Limitations of the reporter system and conclusions*

362 There is a wide range of factors, regulating and influencing the sIC-FcγR interaction. These  
363 include Fcγ-FcγR binding affinity and avidity (Koenderman, 2019), IgG subclass, IgG glycan  
364 profiles and genetic polymorphism (Bruhns et al, 2009; Pincetic et al, 2014; Plomp et al, 2017;  
365 Vidarsson et al, 2014), stoichiometry of antigen-antibody-ratio (Berger et al, 1996; Lux et al,  
366 2013; Pierson et al, 2007), FcγR clustering patterns (Patel et al, 2019), downstream signaling  
367 (Bournazos et al, 2017; Getahun & Cambier, 2015) and the interaction of FcγR with other  
368 receptors (Douek et al, 2009; Ortiz-Stern & Rosales, 2003; Urbaczek et al, 2014; van Egmond  
369 et al, 2015; Vanderbruggen et al, 1994). Our assay is sensitive to amount, size and glycosylation  
370 of sICs and can readily be adapted to include more FcγR genotypes and polymorphisms by  
371 generation of additional reporter cell lines.

372 The major advancements of this reporter system include i) a high accuracy and resolution  
373 regarding FcγR type-specific activation compared to traditional indirect assessment via affinity  
374 measurements, ii) a scalable and quantifiable assay providing flexible high-throughput readouts  
375 in the nanomolar range, iii) an sIC size sensitive reporter system and iv) a comprehensive panel  
376 including all human FcγRs. In practice, the platform is suitable to be implemented into small-  
377 or large-scale screening setups in research as well as routine laboratories. Prospectively, the  
378 reporter cell approach allows for future adaptation as the cells can be equipped with alternative  
379 reporter modules to optimize the methodology for specific applications.

380

381 **Materials and Methods**

382

383 *Cell culture:* All cells were cultured in a 5% CO<sub>2</sub> atmosphere at 37°C. BW5147 mouse  
384 thymoma cells (BW, kindly provided by Ofer Mandelboim, Hadassah Hospital, Jerusalem,  
385 Israel) were maintained at 3x10<sup>5</sup> to 9x10<sup>5</sup> cells/ml in Roswell Park Memorial Institute medium  
386 (RPMI GlutaMAX, Gibco) supplemented with 10% (vol/vol) fetal calf serum (FCS, Biochrom),



387 sodium pyruvate (1x, Gibco) and  $\beta$ -mercaptoethanol (0.1 mM, Gibco). 293T-CD20 (kindly  
388 provided by Irvin Chen, UCLA (Morizono et al, 2010)) were maintained in Dulbecco's  
389 modified Eagle's medium (DMEM, Gibco) supplemented with 10% (vol/vol) FCS.

390

391 *BW5147 cell flow cytometry:* BW5147 cells were harvested by centrifugation at 900 g and RT  
392 from the suspension culture.  $1 \times 10^6$  cells were stained with PE- conjugated anti-human Fc $\gamma$ R  
393 mAbs (BD) or a PE-TexasRed-conjugated human IgG-Fc fragment (Rockland) for 1h at 4°C in  
394 PBS/3%FCS. After 3 washing steps in PBS/3%FCS, the cells were transferred to Flow  
395 cytometry tubes (BD) and analysed using BD LSR Fortessa and FlowJo (V10) software. Cells  
396 sorting was performed at the Lighthouse core facility of the University Hospital Freiburg using  
397 receptor staining (BD Pharmingen, PE-conjugated).

398

399 *Lentiviral transduction:* Lentiviral transduction of BW5147 cells was performed as described  
400 previously (Halenius et al, 2011; Kolb et al, 2019; Van den Hoecke et al, 2017). In brief,  
401 chimeric Fc $\gamma$ R-CD3 $\zeta$  constructs (Corrales-Aguilar et al, 2013) were cloned into a  
402 pUC2CL6IPwo plasmid backbone. For every construct, one 10-cm dish of packaging cell line  
403 at roughly 70% density was transfected with the target construct and two supplementing vectors  
404 providing the VSV gag/pol and VSV-G-env proteins (6  $\mu$ g of DNA each) using  
405 polyethylenimine (22.5  $\mu$ g/ml, Sigma) and Polybrene (4  $\mu$ g/ml; Merck Millipore) in a total  
406 volume of 7 ml (2 ml of a 15-min-preincubated transfection mix in serum-free DMEM added  
407 to 5 ml of fresh full DMEM). After a medium change, virus supernatant harvested from the  
408 packaging cell line 2 days after transfection was then incubated with target BW cells overnight  
409 (3.5 ml of supernatant on  $10^6$  target cells), followed by expansion and pool selection using  
410 complete medium supplemented with 2  $\mu$ g/ml of puromycin (Sigma) over a one week culture  
411 period.

412



413 *human IgG suspension ELISA:* 1  $\mu$ g of IgG1 (rituximab in PBS, 50  $\mu$ l/well) per well was  
414 incubated on a 96well microtiter plate (NUNC Maxisorp) pre-treated (2h at RT) with PBS  
415 supplemented with varying percentages (v/v) of FCS (PAN Biotech). IgG1 bound to the plates  
416 was detected using an HRP-conjugated mouse-anti-human IgG mAb (Jackson  
417 ImmunoResearch).

418

419 *Recombinant antigens and monoclonal antibodies to form sICs:* Recombinant human (rh)  
420 cytokines TNF, IL-5, and VEGFA were obtained from Stem Cell technologies. Recombinant  
421 CD20 was obtained as a peptide (aa141-188, Acc# P11836) containing the binding region of  
422 rituximab (Creative Biolabs). Fc $\gamma$ R-specific mAbs were obtained from Stem Cell technologies  
423 (CD16: clone 3G8; CD32: IV.3). Reverse sICs were generated from these receptor-specific  
424 antibodies using goat-anti-mouse IgG F(ab)<sub>2</sub> fragments (Invitrogen) in a 1:1 ratio.  
425 Pharmaceutically produced humanized monoclonal IgG1 antibodies infliximab (Ifx),  
426 bevacizumab (Bvz), mepolizumab (Mpz) and rituximab (Rtx) were obtained from the  
427 University Hospital Pharmacy Freiburg. Mouse anti-hTNF $\alpha$  (IgG2b, R&D Systems, 983003)  
428 was used to generate sICs reactive with mouse Fc $\gamma$ Rs. sICs were generated by incubation of  
429 antigens and antibodies in reporter cell medium or PBS for 2 h at 37°C.

430

431 *Fc $\gamma$ R receptor activation assay:* Fc $\gamma$ R activation was measured adapting a previously described  
432 cell-based assay (Corrales-Aguilar et al, 2014; Corrales-Aguilar et al, 2013). The assay was  
433 modified to measure Fc $\gamma$ R activation in solution. Briefly, 2x10<sup>5</sup> mouse BW-Fc $\gamma$ R (BW5147)  
434 reporter cells were incubated with synthetic sICs or diluted serum in a total volume of 100  $\mu$ l  
435 for 16 h at 37°C and 5% CO<sub>2</sub>. Incubation was performed in a 96-well ELISA plate (Nunc  
436 maxisorp) pre-treated with PBS/10% FCS (v/v) for 1 h at 4°C. Immobilized IgG was incubated  
437 in PBS on the plates prior to PBS/10% FCS treatment. After 4h incubation, surface mouse  
438 CD69 expression was measured using a high throughput sampler (HTS)-FACS. Reporter cell

439 mouse IL-2 secretion was quantified after 16 h of incubation via anti-IL-2 ELISA as described  
440 earlier (Corrales-Aguilar et al, 2013).

441  
442 *High throughout sampler flow cytometry (HTS-FACS):* After 4h of stimulation,  $1 \times 10^5$  BW5147  
443 reporter cells were stained with APC-conjugated anti-mCD69 (Biolegend; CD69: H1.2F3;  
444 1:100) for 30min at 4°C in PBS/3%FCS. Cells were transferred to a U Form 96well Microplate  
445 (Greiner 650101) and analysed by flow cytometry (BD Fortessa). High Throughput mode was  
446 designed within BD FACSDiva software using HTS mode with the following parameters:  
447 sample flow rate 2 $\mu$ l/s, sample volume 10 $\mu$ l, mixing volume 50 $\mu$ l, mixing speed 200 $\mu$ l/s,  
448 number of mixes 2 cycles and wash volume 200 $\mu$ l.

449  
450 *BW5147 toxicity test:* Cell counting was performed using a Countess II (Life Technologies)  
451 according to supplier instructions. Cell toxicity was measured as a ratio between live and dead  
452 cells judged by trypan blue staining over a 16 h time frame in a 96well format (100  $\mu$ l volume  
453 per well). BW5147 cells were mixed 1:1 with trypan blue (Invitrogen) and analysed using a  
454 Countess II. rhTNF $\alpha$  was diluted in complete medium.

455  
456 *NK cell activation flow cytometry:* PBMC were purified from donor blood using Lymphocyte  
457 separation Media (Anprotec). Blood draw and PBMC purification from donors was approved  
458 by vote 474/18 (ethical review committee, University of Freiburg). Primary NK cells were  
459 separated from donor PBMCs via magnetic bead negative selection (Stem Cell technologies)  
460 and NK cell purity was confirmed via staining of CD3 (Biolegend, clone HIT3a), CD16  
461 (Biolegend, clone 3G8) and CD56 (Miltenyi Biotec, clone AF12-7H3). 96well ELISA plates  
462 (Nunc Maxisorp) were pre-treated with PBS/10% FCS (v/v) for 1 h at 4°C. NK cells were  
463 stimulated in pre-treated plates and incubated at 37°C and 5% CO<sub>2</sub> for 4 h. Golgi Plug and  
464 Golgi Stop solutions (BD) were added as suggested by supplier. CD107a (APC, BD, H4A3)

465 specific conjugated mAb was added at the beginning of the incubation period. Following the  
466 stimulation period, MIP-1 $\beta$  (PE, BD Pharmingen), IFN $\gamma$  (BV-510, Biolegends, 4SB3) and  
467 TNF $\alpha$  (PE/Cy7, Biolegends, MAB11) production was measured via intracellular staining  
468 Cytokines (BD, CytoFix/CytoPerm, Kit as suggested by the supplier). 50 ng/ml PMA  
469 (InvivoGen) + 0.5  $\mu$ M Ionomycin (InvivoGen) were used as a positive stimulation control for  
470 NK cell activation. After 3 washing steps in PBS/3%FCS, the cells were transferred to Flow  
471 cytometry tubes (BD) and analysed using a BD FACS Fortessa and FlowJo (V10) software.

472

473 *Neutrophil adhesion and activation flow cytometry*: Human primary neutrophil granulocytes  
474 were isolated from whole blood of healthy donors via magnetic bead negative selection  
475 (Stemcell #19666). 96well ELISA plates (Nunc Maxisorp) were pre-treated with PBS/10% FCS  
476 (v/v) for 1 h at 4°C. Per reaction, 2x10<sup>5</sup> cells/ml neutrophils were stimulated with ICs in Roswell  
477 Park Memorial Institute medium (RPMI GlutaMAX, Gibco) supplemented with 10% (vol/vol)  
478 fetal calf serum (FCS, Biochrom) and incubated at 37°C and 5% CO<sub>2</sub> for 30 min. Adhesion and  
479 activation markers of neutrophils were measured by surface staining of CD11B (APC,  
480 Biolegend, ICRF44), CD66B (FITC, Stemcell, G10F5) and L-selectin (PE, Biolegend, DREG-  
481 56)(Ilton et al, 1999; Khawaja et al, 2019; Lard et al, 1999; Veen et al, 1998). Cells were then  
482 analysed by flow cytometry. Fc $\gamma$ RII or Fc $\gamma$ RIII cross-linking controls were performed by  
483 immobilization of receptor specific mAbs (Stem cell technologies, IV.3 and 3G8) before the  
484 ELISA plate was blocked.

485

486 *Asymmetric flow field flow fractionation (AF4)*: The AF4 system consisted of a flow controller  
487 (Eclipse AF4, Wyatt), a MALS detector (DAWN Heleos II, Wyatt), a UV detector (1260  
488 Infinity G1314F, Agilent) and the separation channel (SC channel, PES membrane, cut-off 10  
489 kDa, 490  $\mu$ m spacer, wide type, Wyatt). Elution buffer: 1.15 g/L Na<sub>2</sub>HPO<sub>4</sub> (Merck), 0.20 g/L  
490 NaH<sub>2</sub>PO<sub>4</sub> x H<sub>2</sub>O (Merck), 8.00 g/L NaCl (Sigma) and 0,20 g/L NaN<sub>3</sub> (Sigma), adjusted to pH

491 7.4, filtered through 0.1  $\mu\text{m}$ . AF4 sequence ( $V_x$  = cross flow in mL/min): (a) elution (2 min,  
492  $V_x$ : 1.0); (b) focus (1 min,  $V_x$ : 1.0), focus + inject (1 min,  $V_x$ : 1.0, inject flow: 0.2 mL/min),  
493 repeated three times; (c) elution (30 min, linear  $V_x$  gradient: 1.0 to 0.0); (d) elution (15 min,  
494  $V_x$ : 0.0); (e) elution + inject (5 min,  $V_x$ : 0.0). A total protein mass of  $17 \pm 0.3 \mu\text{g}$  (Ifx, rhTNF $\alpha$   
495 or ICs, respectively) was injected. The eluted sample concentration was calculated from the UV  
496 signal at 280 nm using extinction coefficients of 1.240 mL/(mg cm) or 1.450 mL/(mg cm) in  
497 the case of TNF $\alpha$  or Ifx, respectively. For the ICs, extinction coefficients were not available  
498 and difficult to calculate as the exact stoichiometry is not known. An extinction coefficient of  
499 1.450 mL/(mg cm) was used for calculating the molar masses of all ICs. Especially in the case  
500 of ICs rich in TNF $\alpha$ , the true coefficients should be lower, and the molar masses of these  
501 complexes are overestimated by not more than 14 %. The determined molar masses for TNF $\alpha$ -  
502 rich complexes are therefore biased but the observed variations in molar mass for the different  
503 ICs remain valid. The mass-weighted mean of the distribution of molar masses for each sample  
504 was calculated using the ASTRA 7 software package (Wyatt).

505

506 *SLE patient cohort*: Sera from patients with SLE were obtained from the Immunologic,  
507 Rheumatologic Biobank (IR-B) of the Department of Rheumatology and Clinical Immunology.  
508 Biobanking and the project were approved by the local ethical committee of the University of  
509 Freiburg (votes 507/16 and 624/14). All patients who provided blood to the biobank had  
510 provided written informed consent. Ethical Statement: The study was designed in accordance  
511 with the guidelines of the Declaration of Helsinki (revised 2013). Patients with SLE ( $n = 25$ )  
512 and healthy controls ( $n = 4$ ) were examined. All patients met the revised ACR classification  
513 criteria for SLE. Disease activity was assessed using the SLEDAI-2K score. C3d levels were  
514 analyzed in EDTA plasma using rocket double decker immune-electrophoresis with antisera  
515 against C3d (Polyclonal Rabbit Anti-Human C3d Complement, Agilent) and C3c (Polyclonal  
516 Rabbit Anti-Human C3c Complement Agilent) as previously described (Rother et al, 1993).

517 Anti-human dsDNA antibodies titers were determined in serum using an anti-dsDNA IgG  
518 ELISA kit (diagnostik-a GmbH).

519

520 *Patient serum IC precipitation:* For polyethylene glycol (PEG) precipitation human sera were  
521 mixed with PEG 6000 (Sigma-Aldrich) in PBS at a final concentration of 10% PEG 6000. After  
522 overnight incubation at 4°C, ICs were precipitated by centrifugation at 2000 x g for 30 min at  
523 4 °C, pellets were washed once with PEG 6000 and then centrifuged at 2000 x g for 20 min at  
524 4 °C. Supernatants were harvested and precipitates re-suspended in pre-warmed PBS for 1 h at  
525 37 °C. IgG concentrations of serum, precipitates and supernatants obtained after precipitation  
526 were quantified by Nanodrop (Thermo Scientific™) measurement.

527

528 *Mice and Models:* Animal experiments were approved by the local governmental commission  
529 for animal protection of Freiburg (Regierungspräsidium Freiburg, approval no. G16/59 and  
530 G19/21). Lupus-prone (NZBxNZW)F1 mice (NZB/WF1) were generated by crossing  
531 NZB/BINJ mice with NZW/LacJ mice, purchased from The Jackson Laboratory. KRNTg mice  
532 were obtained from F. Nimmerjahn (Universität Erlangen-Nürnberg) with the permission of D.  
533 Mathis and C. Benoist (Harvard Medical School, Boston, MA), C57BL/6 mice (BL/6) and  
534 NOD/ShiLtJArc (NOD/Lt) mice were obtained from the Charles River Laboratories. K/BxN  
535 (KRNTgxNOD)F1 mice (K/BxN) were obtained by crossing KRNTg mice and NOD/Lt mice.  
536 All mice were housed in a 12-h light/dark cycle, with food and water ad libitum. Mice were  
537 euthanized and blood collected for serum preparation from 16 weeks old BL/6 animals, from  
538 16 weeks old arthritic K/BxN animals and from 26 – 38 weeks old NZB/WF1 mice with  
539 established glomerulonephritis.

540

541 *Statistical analyses:* Statistical analyses were performed using Graphpad Prism software (v6)  
542 and appropriate tests.

543

544 **Supplementary Materials**

545 Fig. S1. rhTNF $\alpha$  is not toxic to mouse lymphocyte BW5147 cells even at high concentrations.

546 Fig. S2. Fc $\gamma$ Rs are activated by VEGFA and IL-5 sICs

547 Fig. S3. Distinct activation patterns of NK cells incubated with inverse sICs

548 Fig. S4. AF4 elution profiles of Ifx/TNF $\alpha$ -immune complexes.

549 Table S1. Analysis of the molar mass distribution of ICs from AF4 data.

550

551 **Figure legends**

552

553 **Fig. 1. Establishment of a cell-based reporter assay measuring FcγR activation in response**  
554 **to sICs.** A) BW5147 reporter cells stably expressing human FcγR-ζ chain chimeras or BW5147  
555 parental cells (grey/dashed) were stained with FcγR specific conjugated mAbs as indicated and  
556 measured for surface expression of FcγRs via flow cytometry. B) FCS coating of an ELISA  
557 microtiter plate allows for suspension of subsequently added IgG. Plate bound IgG was  
558 quantified via ELISA. C) Immobilized IC, immobilized IgG and IgG opsonized cells represent  
559 qualitatively similar ligands for FcγRs. Response curves of human FcγRs activated by  
560 opsonized cells (293T cells stably expressing CD20 + Rituximab [Rtx]), immobilized IC (rec.  
561 soluble CD20 + Rtx) and immobilized IgG (Rtx). sICs formed using monovalent antigen (rec.  
562 soluble CD20 + Rtx) do not activate human FcγRs. X-Axis shows sample concentration  
563 determined by antibody molarity. Y-Axis shows FcγR activation determined by reporter cell  
564 mouse IL-2 production (OD 450nm). Two independent experiments performed in technical  
565 duplicates. Error bars = SD. D) Schematic of used assay setups. BW5147 reporter cells  
566 expressing chimeric human FcγR receptors express endogenous CD69 or secrete mouse IL-2  
567 in response to FcγR activation by clustered IgG. sICs are generated using mAbs and multivalent  
568 antigens. sIC suspension requires pre-blocking of an ELISA plate using PBS supplemented  
569 with 10% FCS (FCS coat, grey-dashed).

570

571 **Fig. 2. FcγRs are activated by sICs formed from multivalent antigens.** Ultra-pure antigen  
572 (Ag, TNF-α) mixed with therapy-grade mAb (infliximab, Ifx) was used to generate sICs. X-  
573 Axis: concentrations of stimulant expressed as molarity of either mAb or Ag monomer and IC  
574 (expressed as mAb molarity) at a mAb:Ag ratio of 1:2. Soluble antigen or soluble antibody  
575 alone served as negative controls and were not sufficient to activate human FcγRs. Immobilized  
576 IgG (Rtx) or immobilized FcγR-specific mAbs served as positive controls. Two independent

577 experiments performed in technical duplicates. Error bars = SD. Error bars smaller than  
578 symbols are not shown. Left panel: IL-2 quantification 16 h after reporter cell activation.  
579 Background (blank) was subtracted (dashed line). IL-2 was measured via anti-IL-2 ELISA  
580 ( $A_{450nm}$ ) and IL-2 concentrations were calculated from an IL-2 standard. Right panel: Reporter  
581 cell CD69 expression 4 h post trigger was measured using flow cytometry. MFI were  
582 normalized to untreated cells (ctrl.) and are presented as fold-change increase.

583

584 **Fig. 3. The Fc $\gamma$ R-dependent activation pattern of primary NK cells or primary**  
585 **neutrophils depends on IC solubility.** A) Negatively selected primary NK cells purified from  
586 PBMCs of three healthy donors were tested for activation markers using flow cytometry. NK  
587 cells were incubated with immobilized IgG (mepolizumab, Mpz), soluble IC (Mpz:IL-5 = 1:1),  
588 soluble Mpz or soluble IL-5 (all at 200 nM,  $10^6$  cells). Incubation with PMA and Ionomycin  
589 (Iono) served as a positive control. Incubation with medium alone served as a negative control.  
590 Means of technical duplicates. Error bars = SD. One-way ANOVA (Tukey); \* $p < 0.05$ ,  
591 \*\* $p < 0.01$ , \*\*\* $p < 0.001$ , \*\*\*\* $p < 0.0001$ . B) Negatively selected primary neutrophils purified  
592 from whole blood of four healthy donors were tested for adhesion and activation markers using  
593 flow cytometry. Neutrophils were incubated with immobilized IgG (Mpz), soluble IC (Mpz:IL-  
594 5 = 1:1), soluble Mpz or soluble IL-5 (all at 200 nM,  $2 \times 10^5$  cells). Incubation with PMA or  
595 immobilized rituximab served as positive controls. Incubation with medium served as a  
596 negative control. Immobilized Fc $\gamma$ RII and Fc $\gamma$ RIII specific mAbs served as functional controls.  
597 Mean fluorescence intensity (MFI) values at  $t = 30$  minutes of incubation are presented as increase  
598 over  $t = 0$  min. Means of technical duplicates. Error bars = SD. Two-way ANOVA compared to  
599 medium (Dunnett); \* $p < 0.05$ , \*\* $p < 0.01$ , \*\*\* $p < 0.001$ , \*\*\*\* $p < 0.0001$ .

600

601 **Fig. 4. Fc $\gamma$ RIIB/C and Fc $\gamma$ R-IIIa respond to sIC size reproducing a Heidelberger-Kendall**  
602 **like precipitation curve.** A) infliximab (mAb) and rhTNF $\alpha$  (Ag) were mixed at different ratios



603 (17  $\mu\text{g}$  total protein, calculated from monomer molarity) and analysed via AF4. sIC size is  
604 maximal at a 1:3 ratio of mAb:Ag and reduced when either mAb or Ag are given in excess.  
605  $\langle M \rangle_w$  = mass-weighted mean of the molar mass distribution. Three independent experiments.  
606 Error bars = SD. Data taken from Table S1. One complete run analysis is shown in Fig. S2. B)  
607 sICs of different size were generated by cross-titration according to the AF4 determination.  
608 Reporter cells were incubated with fixed amounts of either mAb (infliximab, left) or Ag  
609 (rhTNF $\alpha$ , right) and titrated amounts of antigen or antibody, respectively. X-Axis shows  
610 titration of either antigen or antibody, respectively (TNF $\alpha$  calculated as monomer). Two  
611 independent experiments performed in technical duplicates. Error bars = SD. C) Purified  
612 primary NK cells from three different donors were incubated with cross-titrated sICs as in A.  
613 NK cells were measured for MIP-1 $\beta$  expression (% positivity). Incubation with PMA and  
614 Ionomycin served as a positive control. Incubation with medium alone served as a negative  
615 control. Measured in technical duplicates. Error bars = SD.

616

617 **Fig. 5. The reporter assay enables quantification of serum-derived sICs from SLE**  
618 **patients.** Serum derived sIC from systemic lupus erythematosus (SLE) patients activate human  
619 Fc $\gamma$ R reporter cells. 25 patients and 4 healthy control individuals were separated into three  
620 groups for measurement. A) Experiments shown for an exemplary group of 8 SLE patients and  
621 two healthy individuals. Dose-dependent reactivity of Fc $\gamma$ Rs IIIA and IIB/C was observed only  
622 for SLE patient sera and not for sera from healthy individuals. One exemplary experiment  
623 performed in technical duplicates. Error bars = SD. B) Activation of Fc $\gamma$ Rs IIB/C and IIIA by  
624 patient serum is mediated by serum derived sICs. Patient serum samples were depleted of sICs  
625 by PEG precipitation and the supernatant (SN) was compared to untreated serum regarding  
626 Fc $\gamma$ R activation (left). One experiment performed in technical duplicates. Error bars =SD. IgG  
627 concentration in the precipitate (PC), supernatant (SN) or unfractionated serum respectively is  
628 shown in the bar graph (right). C) Fc $\gamma$ R activation data from A was compared to conventional

629 SLE disease markers ( $\alpha$ -dsDNA levels indicated as IU/ml or C3d concentrations indicated as  
630 mg/L). Fc $\gamma$ R activation from a dose-response curve as in A was calculated as area under curve  
631 (AUC) for each SLE patient (n=25) or healthy individual (n=4) and expressed as fold change  
632 compared to the healthy control mean. SLE patients with  $\alpha$ -dsDNA levels below 50 IU/ml and  
633 C3d values below 6 mg/L were excluded. One-tailed Spearman's.

634

635 **Fig. 6. The reporter assay can be applied to mouse models of autoimmune disease. A)**

636 Reporter cells expressing mFc $\gamma$ RIII, mFc $\gamma$ RIV or parental BW5147 cells were incubated with  
637 titrated amounts of synthetic sICs generated from rhTNF $\alpha$  and mouse-anti-hTNF $\alpha$  at a 1:1 ratio  
638 by mass. One experiment performed in technical duplicates. Error bars = SD. B) Titrations of  
639 3 mouse sera per group (C57BL/6, K/BxN or NZB/WF1) were incubated with mFc $\gamma$ R reporter  
640 cells and Fc $\gamma$ R activation was assessed as described above. Sera from BL/6 mice served as  
641 negative control. Two independent experiments in technical duplicates. Error bars = SD.

642

643

644

645

646

647

648

649

650

651

652

653

654

## 655 **References**

- 656 Anania JC, Chenoweth AM, Wines BD, Hogarth PM (2019) The Human FcγRII (CD32)  
657 Family of Leukocyte FcR in Health and Disease. *Front Immunol* 10: 464  
658
- 659 Antes U, Heinz HP, Schultz D, Brackertz D, Loos M (1991) C1q-bearing immune complexes  
660 detected by a monoclonal antibody to human C1q in rheumatoid arthritis sera and synovial  
661 fluids. *Rheumatol Int* 10: 245-250  
662
- 663 Aoyama M, Tada M, Ishii-Watabe A (2019) A Cell-Based Reporter Assay Measuring the  
664 Activation of Fc Gamma Receptors Induced by Therapeutic Monoclonal Antibodies. *Methods*  
665 *Mol Biol* 1904: 423-429  
666
- 667 Bano A, Pera A, Almoukayed A, Clarke THS, Kirmani S, Davies KA, Kern F (2019) CD28 (null)  
668 CD4 T-cell expansions in autoimmune disease suggest a link with cytomegalovirus infection.  
669 *F1000Res* 8  
670
- 671 Berger S, Ballo H, Stutte HJ (1996) Immune complex-induced interleukin-6, interleukin-10 and  
672 prostaglandin secretion by human monocytes: A network of pro- and anti-inflammatory  
673 cytokines dependent on the antigen:antibody ratio. *Eur J Immunol* 26: 1297-1301  
674
- 675 Bohm S, Kao D, Nimmerjahn F (2014) Sweet and sour: the role of glycosylation for the anti-  
676 inflammatory activity of immunoglobulin G. *Current topics in microbiology and immunology*  
677 *382*: 393-417  
678
- 679 Bournazos S, Wang TT, Dahan R, Maamary J, Ravetch JV (2017) Signaling by Antibodies:  
680 Recent Progress. *Annu Rev Immunol* 35: 285-311  
681
- 682 Breunis WB, van Mirre E, Bruin M, Geissler J, de Boer M, Peters M, Roos D, de Haas M,  
683 Koene HR, Kuijpers TW (2008) Copy number variation of the activating FCGR2C gene  
684 predisposes to idiopathic thrombocytopenic purpura. *Blood* 111: 1029-1038  
685
- 686 Briant L, Coudronniere N, Robert-Hebmann V, Benkirane M, Devaux C (1996) Binding of HIV-  
687 1 virions or gp120-anti-gp120 immune complexes to HIV-1-infected quiescent peripheral blood  
688 mononuclear cells reveals latent infection. *J Immunol* 156: 3994-4004  
689
- 690 Bruhns P (2012) Properties of mouse and human IgG receptors and their contribution to  
691 disease models. *Blood* 119: 5640-5649  
692
- 693 Bruhns P, Iannascoli B, England P, Mancardi DA, Fernandez N, Jorieux S, Daeron M (2009)  
694 Specificity and affinity of human Fcγ receptors and their polymorphic variants for human  
695 IgG subclasses. *Blood* 113: 3716-3725  
696
- 697 Bruhns P, Jonsson F (2015) Mouse and human FcR effector functions. *Immunol Rev* 268: 25-  
698 51  
699
- 700 Chauhan AK (2017) Editorial: Immune Complexes in Disease Pathology. *Front Immunol* 8:  
701 173  
702
- 703 Cheng ZJ, Garvin D, Paguio A, Moravec R, Engel L, Fan F, Surowy T (2014) Development of  
704 a robust reporter-based ADCC assay with frozen, thaw-and-use cells to measure Fc effector  
705 function of therapeutic antibodies. *J Immunol Methods* 414: 69-81  
706
- 707 Corrales-Aguilar E, Trilling M, Hunold K, Fiedler M, Le VT, Reinhard H, Ehrhardt K, Merce-  
708 Maldonado E, Aliyev E, Zimmermann A et al (2014) Human cytomegalovirus Fcγ binding

- 709 proteins gp34 and gp68 antagonize Fcγ receptors I, II and III. *PLoS pathogens* 10:  
710 e1004131  
711
- 712 Corrales-Aguilar E, Trilling M, Reinhard H, Merce-Maldonado E, Widera M, Schaal H,  
713 Zimmermann A, Mandelboim O, Hengel H (2013) A novel assay for detecting virus-specific  
714 antibodies triggering activation of Fcγ receptors. *Journal of immunological methods* 387:  
715 21-35  
716
- 717 Douek DC, Rittirsch D, Flierl MA, Day DE, Nadeau BA, Zetoune FS, Sarma JV, Werner CM,  
718 Wanner GA, Simmen H-P et al (2009) Cross-Talk between TLR4 and Fcγ Receptor III (CD16)  
719 Pathways. *Plos Pathog* 5: e1000464  
720
- 721 Dubois EL, Horowitz RE, Demopoulos HB, Teplitz R (1966) NZB/NZW mice as a model of  
722 systemic lupus erythematosus. *JAMA* 195: 285-289  
723
- 724 Duchemin AM, Ernst LK, Anderson CL (1994) Clustering of the High-Affinity Fc Receptor for  
725 Immunoglobulin-G (Fc-γ<sub>1</sub>R) Results in Phosphorylation of Its Associated γ-  
726 Chain. *J Biol Chem* 269: 12111-12117  
727
- 728 Fossati G, Bucknall RC, Edwards SW (2002) Insoluble and soluble immune complexes  
729 activate neutrophils by distinct activation mechanisms: changes in functional responses  
730 induced by priming with cytokines. *Ann Rheum Dis* 61: 13-19  
731
- 732 Getahun A, Cambier JC (2015) Of ITIMs, ITAMs, and ITAMis: revisiting immunoglobulin Fc  
733 receptor signaling. *Immunol Rev* 268: 66-73  
734
- 735 Granger V, Peyneau M, Chollet-Martin S, de Chaisemartin L (2019) Neutrophil Extracellular  
736 Traps in Autoimmunity and Allergy: Immune Complexes at Work. *Front Immunol* 10: 2824  
737
- 738 Greenberg S, Chang P, Silverstein SC (1994) Tyrosine phosphorylation of the γ subunit  
739 of Fcγ receptors, p72<sup>syk</sup>, and paxillin during Fcγ receptor-mediated phagocytosis in  
740 macrophages. *J Biol Chem* 269: 3897-3902  
741
- 742 Halenius A, Hauka S, Dolken L, Stindt J, Reinhard H, Wiek C, Hanenberg H, Koszinowski UH,  
743 Momburg F, Hengel H (2011) Human cytomegalovirus disrupts the major histocompatibility  
744 complex class I peptide-loading complex and inhibits tapasin gene transcription. *J Virol* 85:  
745 3473-3485  
746
- 747 Heidelberger M, Kendall FE (1929) A Quantitative Study of the Precipitin Reaction between  
748 Type Iii Pneumococcus Polysaccharide and Purified Homologous Antibody. *J Exp Med* 50:  
749 809-823  
750
- 751 Heidelberger M, Kendall FE (1935) The Precipitin Reaction between Type Iii Pneumococcus  
752 Polysaccharide and Homologous Antibody : Iii. A Quantitative Study and a Theory of the  
753 Reaction Mechanism. *J Exp Med* 61: 563-591  
754
- 755 Hsieh YT, Aggarwal P, Cirelli D, Gu L, Surowy T, Mozier NM (2017) Characterization of Fc  
756 γ<sub>1</sub> RIIIA effector cells used in in vitro ADCC bioassay: Comparison of primary NK cells  
757 with engineered NK-92 and Jurkat T cells. *Journal of Immunological Methods* 441: 56-66  
758
- 759 Ilton MK, Langton PE, Taylor ML, Misso NL, Newman M, Thompson PJ, Hung J (1999)  
760 Differential expression of neutrophil adhesion molecules during coronary artery surgery with  
761 cardiopulmonary bypass. *J Thorac Cardiovasc Surg* 118: 930-937  
762
- 763 Kaneko Y, Nimmerjahn F, Ravetch JV (2006) Anti-inflammatory activity of immunoglobulin G  
764 resulting from Fc sialylation. *Science* 313: 670-673

765  
766 Khawaja AA, Pericleous C, Ripoll VM, Porter JC, Giles IP (2019) Autoimmune rheumatic  
767 disease IgG has differential effects upon neutrophil integrin activation that is modulated by the  
768 endothelium. *Sci Rep* 9: 1283  
769  
770 Kiefer F, Brumell J, Al-Alawi N, Latour S, Cheng A, Veillette A, Grinstein S, Pawson T (1998)  
771 The Syk protein tyrosine kinase is essential for Fc gamma receptor signaling in macrophages  
772 and neutrophils. *Mol Cell Biol* 18: 4209-4220  
773  
774 Koenderman L (2019) Inside-Out Control of Fc-Receptors. *Front Immunol* 10: 544  
775  
776 Koffler D, Agnello V, Thoburn R, Kunkel HG (1971) Systemic lupus erythematosus: prototype  
777 of immune complex nephritis in man. *J Exp Med* 134: 169-179  
778  
779 Kolb P, Hoffmann K, Sievert A, Reinhard H, Merce-Maldonado E, Le-Trilling VTK, Halenius A,  
780 Gutle D, Hengel H (2021) Human Cytomegalovirus antagonizes activation of Fc gamma  
781 receptors by distinct and synergizing modes of IgG manipulation. *Elife* 10  
782  
783 Kolb P, Sijmons S, McArdle MR, Taher H, Womack J, Hughes C, Ventura A, Jarvis MA, Stahl-  
784 Hennig C, Hansen S et al (2019) Identification and Functional Characterization of a Novel Fc  
785 Gamma-Binding Glycoprotein in Rhesus Cytomegalovirus. *J Virol* 93  
786  
787 Kouskoff V, Korganow AS, Duchatelle V, Degott C, Benoist C, Mathis D (1996) Organ-specific  
788 disease provoked by systemic autoimmunity. *Cell* 87: 811-822  
789  
790 Lagasse HAD, Hengel H, Golding B, Sauna ZE (2019) Fc-Fusion Drugs Have Fc gamma R/C1q  
791 Binding and Signaling Properties That May Affect Their Immunogenicity. *AAPS J* 21: 62  
792  
793 Lard LR, Mul FPJ, de Haas M, Roos D, Duits AJ (1999) Neutrophil activation in sickle cell  
794 disease. *J Leukocyte Biol* 66: 411-415  
795  
796 Levinsky RJ (1978) Role of circulating soluble immune complexes in disease. *Arch Dis Child*  
797 53: 96-99  
798  
799 Levinsky RJ, Cameron JS, Soothill JF (1977) Serum immune complexes and disease activity  
800 in lupus nephritis. *Lancet* 1: 564-567  
801  
802 Lisi S, Sisto M, Lofrumento DD, D'Amore S, D'Amore M (2011) Advances in the understanding  
803 of the Fc gamma receptors-mediated autoantibodies uptake. *Clin Exp Med* 11: 1-10  
804  
805 Lu LL, Suscovich TJ, Fortune SM, Alter G (2018) Beyond binding: antibody effector functions  
806 in infectious diseases. *Nat Rev Immunol* 18: 46-61  
807  
808 Luo Y, Pollard JW, Casadevall A (2010) Fc gamma receptor cross-linking stimulates cell  
809 proliferation of macrophages via the ERK pathway. *J Biol Chem* 285: 4232-4242  
810  
811 Lux A, Yu X, Scanlan CN, Nimmerjahn F (2013) Impact of immune complex size and  
812 glycosylation on IgG binding to human Fc gamma Rs. *J Immunol* 190: 4315-4323  
813  
814 Madalinski K, Burczynska B, Heermann KH, Uy A, Gerlich WH (1991) Analysis of viral proteins  
815 in circulating immune complexes from chronic carriers of hepatitis B virus. *Clin Exp Immunol*  
816 84: 493-500  
817  
818 Mayadas TN, Tsokos GC, Tsuboi N (2009) Mechanisms of immune complex-mediated  
819 neutrophil recruitment and tissue injury. *Circulation* 120: 2012-2024  
820

- 821 Metes D, Ernst LK, Chambers WH, Sulica A, Herberman RB, Morel PA (1998) Expression of  
822 functional CD32 molecules on human NK cells is determined by an allelic polymorphism of the  
823 FcgammaRIIC gene. *Blood* 91: 2369-2380  
824
- 825 Morizono K, Ku A, Xie Y, Harui A, Kung SK, Roth MD, Lee B, Chen IS (2010) Redirecting  
826 lentiviral vectors pseudotyped with Sindbis virus-derived envelope proteins to DC-SIGN by  
827 modification of N-linked glycans of envelope proteins. *J Virol* 84: 6923-6934  
828
- 829 Mulligan MS, Hevel JM, Marletta MA, Ward PA (1991) Tissue-Injury Caused by Deposition of  
830 Immune-Complexes Is L-Arginine Dependent. *P Natl Acad Sci USA* 88: 6338-6342  
831
- 832 Nimmerjahn F, Ravetch JV (2006) Fcgamma receptors: old friends and new family members.  
833 *Immunity* 24: 19-28  
834
- 835 Nimmerjahn F, Ravetch JV (2008) Fcgamma receptors as regulators of immune responses.  
836 *Nat Rev Immunol* 8: 34-47  
837
- 838 Nimmerjahn F, Ravetch JV (2010) Antibody-mediated modulation of immune responses.  
839 *Immunol Rev* 236: 265-275  
840
- 841 Nydegger UE, Davis JSt (1980) Soluble immune complexes in human disease. *CRC Crit Rev*  
842 *Clin Lab Sci* 12: 123-170  
843
- 844 Oh SK, Cruikshank WW, Raina J, Blanchard GC, Adler WH, Walker J, Kornfeld H (1992)  
845 Identification of HIV-1 envelope glycoprotein in the serum of AIDS and ARC patients. *J Acquir*  
846 *Immune Defic Syndr* (1988) 5: 251-256  
847
- 848 Ortiz-Stern A, Rosales C (2003) Cross-talk between Fc receptors and integrins. *Immunol Lett*  
849 90: 137-143  
850
- 851 Patel KR, Roberts JT, Barb AW (2019) Multiple Variables at the Leukocyte Cell Surface Impact  
852 Fc gamma Receptor-Dependent Mechanisms. *Front Immunol* 10: 223  
853
- 854 Pierson TC, Xu Q, Nelson S, Oliphant T, Nybakken GE, Fremont DH, Diamond MS (2007) The  
855 stoichiometry of antibody-mediated neutralization and enhancement of West Nile virus  
856 infection. *Cell Host Microbe* 1: 135-145  
857
- 858 Pincetic A, Bournazos S, DiLillo DJ, Maamary J, Wang TT, Dahan R, Fiebiger BM, Ravetch  
859 JV (2014) Type I and type II Fc receptors regulate innate and adaptive immunity. *Nat Immunol*  
860 15: 707-716  
861
- 862 Plomp R, Ruhaak LR, Uh HW, Reiding KR, Selman M, Houwing-Duistermaat JJ, Slagboom  
863 PE, Beekman M, Wuhler M (2017) Subclass-specific IgG glycosylation is associated with  
864 markers of inflammation and metabolic health. *Sci Rep* 7: 12325  
865
- 866 Rajan TV (2003) The Gell-Coombs classification of hypersensitivity reactions: a re-  
867 interpretation. *Trends in immunology* 24: 376-379  
868
- 869 Rother E, Lang B, Coldewey R, Hartung K, Peter HH (1993) Complement split product C3d as  
870 an indicator of disease activity in systemic lupus erythematosus. *Clin Rheumatol* 12: 31-35  
871
- 872 Shashidharamurthy R, Zhang F, Amano A, Kamat A, Panchanathan R, Ezekwudo D, Zhu C,  
873 Selvaraj P (2009) Dynamics of the interaction of human IgG subtype immune complexes with  
874 cells expressing R and H allelic forms of a low-affinity Fc gamma receptor CD32A. *J Immunol*  
875 183: 8216-8224  
876



- 877 Stopforth RJ, Oldham RJ, Tutt AL, Duriez P, Chan HTC, Binkowski BF, Zimprich C, Li D,  
878 Hargreaves PG, Cong M et al (2018) Detection of Experimental and Clinical Immune  
879 Complexes by Measuring SHIP-1 Recruitment to the Inhibitory FcγRIIB. *J Immunol* 200:  
880 1937-1950
- 881
- 882 Szittner Z, Bentlage AEH, Rovero P, Migliorini P, Lorand V, Prechl J, Vidarsson G (2016)  
883 Label-free detection of immune complexes with myeloid cells. *Clin Exp Immunol* 185: 72-80  
884
- 885 Tada M, Ishii-Watabe A, Suzuki T, Kawasaki N (2014) Development of a cell-based assay  
886 measuring the activation of FcγRIIa for the characterization of therapeutic monoclonal  
887 antibodies. *Plos One* 9: e95787
- 888
- 889 Tahir S, Fukushima Y, Sakamoto K, Sato K, Fujita H, Inoue J, Uede T, Hamazaki Y, Hattori M,  
890 Minato N (2015) A CD153+CD4+ T follicular cell population with cell-senescence features  
891 plays a crucial role in lupus pathogenesis via osteopontin production. *J Immunol* 194: 5725-  
892 5735
- 893
- 894 Tanaka M, Krutzik SR, Sieling PA, Lee DJ, Rea TH, Modlin RL (2009) Activation of Fc γ  
895 RI on monocytes triggers differentiation into immature dendritic cells that induce autoreactive  
896 T cell responses. *J Immunol* 183: 2349-2355
- 897
- 898 Thanadetsunton C, Ngamjanyaporn P, Setthaudom C, Hodge K, Saengpiya N, Pisitkun P  
899 (2018) The model of circulating immune complexes and interleukin-6 improves the prediction  
900 of disease activity in systemic lupus erythematosus. *Sci Rep* 8: 2620
- 901
- 902 Urbaczek AC, Toller-Kawahisa JE, Fonseca LM, Costa PI, Faria CM, Azzolini AE, Lucisano-  
903 Valim YM, Marzocchi-Machado CM (2014) Influence of FcγRIIIb polymorphism on its  
904 ability to cooperate with FcγRIIa and CR3 in mediating the oxidative burst of human  
905 neutrophils. *Hum Immunol* 75: 785-790
- 906
- 907 Van den Hoecke S, Ehrhardt K, Kolpe A, El Bakkouri K, Deng L, Grootaert H, Schoonooghe  
908 S, Smet A, Bentahir M, Roose K et al (2017) Hierarchical and Redundant Roles of Activating  
909 FcγRIIb in Protection against Influenza Disease by M2e-Specific IgG1 and IgG2a  
910 Antibodies. *J Virol* 91
- 911
- 912 van Egmond M, Vidarsson G, Bakema JE (2015) Cross-talk between pathogen recognizing  
913 Toll-like receptors and immunoglobulin Fc receptors in immunity. *Immunol Rev* 268: 311-327  
914
- 915 Vanderbruggen T, Kok PTM, Raaijmakers JAM, Lammers JWJ, Koenderman L (1994)  
916 Cooperation between Fc-Gamma Receptor-1 and Complement Receptor-Type-3 during  
917 Activation of Platelet-Activating-Factor Release by Cytokine-Primed Human Eosinophils.  
918 *Journal of Immunology* 153: 2729-2735
- 919
- 920 Veen JCCMI, Grootendorst DC, Bel EH, Smits HH, van der Keur M, Sterk PJ, Hiemstra PS  
921 (1998) CD11b and L-selectin expression on eosinophils and neutrophils in blood and induced  
922 sputum of patients with asthma compared with normal subjects. *Clinical and Experimental*  
923 *Allergy* 28: 606-615
- 924
- 925 Vidarsson G, Dekkers G, Rispen T (2014) IgG subclasses and allotypes: from structure to  
926 effector functions. *Front Immunol* 5: 520
- 927
- 928 Vossebeld PJ, Homburg CH, Roos D, Verhoeven AJ (1997) The anti-Fc γ RIII mAb 3G8  
929 induces neutrophil activation via a cooperative actin of Fc γ RIIIb and Fc γ RIIa.  
930 *Int J Biochem Cell Biol* 29: 465-473
- 931

- 932 Vuckovic F, Kristic J, Gudelj I, Teruel M, Keser T, Pezer M, Pucic-Bakovic M, Stambuk J,  
933 Trbojevic-Akmacic I, Barrios C et al (2015) Association of systemic lupus erythematosus with  
934 decreased immunosuppressive potential of the IgG glycome. *Arthritis Rheumatol* 67: 2978-  
935 2989
- 936
- 937 Vuitton DA, Vuitton L, Seilles E, Galanaud P (2020) A plea for the pathogenic role of immune  
938 complexes in severe Covid-19. *Clin Immunol* 217: 108493
- 939
- 940 Wang TT, Ravetch JV (2015) Immune complexes: not just an innocent bystander in chronic  
941 viral infection. *Immunity* 42: 213-215
- 942
- 943 Ward PA, Fattahi F, Bosmann M (2016) New Insights into Molecular Mechanisms of Immune  
944 Complex-Induced Injury in Lung. *Front Immunol* 7: 86
- 945
- 946 Yamada DH, Elsaesser H, Lux A, Timmerman JM, Morrison SL, de la Torre JC, Nimmerjahn  
947 F, Brooks DG (2015) Suppression of Fcγ-receptor-mediated antibody effector function  
948 during persistent viral infection. *Immunity* 42: 379-390
- 949
- 950 Zarbock A, Ley K (2009) Neutrophil adhesion and activation under flow. *Microcirculation* 16:  
951 31-42
- 952
- 953 Zhao S, Grieshaber-Bouyer R, Rao DA, Kolb P, Chen H, Andreeva I, Tretter T, Lorenz HM,  
954 Watzl C, Wabnitz G et al (2021) JAK inhibition prevents the induction of pro-inflammatory HLA-  
955 DR(+) CD90(+) RA synovial fibroblasts by IFN. *Arthritis Rheumatol*
- 956
- 957 Zubler RH, Nydegger U, Perrin LH, Fehr K, McCormick J, Lambert PH, Miescher PA (1976)  
958 Circulating and intra-articular immune complexes in patients with rheumatoid arthritis.  
959 Correlation of 125I-Clq binding activity with clinical and biological features of the disease. *J*  
960 *Clin Invest* 57: 1308-1319
- 961
- 962
- 963



964 **Acknowledgements:** We thank T. Schleyer (IR-B Biobank) for providing patient samples. We  
965 are indebted to Falk Nimmerjahn (Universität Erlangen-Nürnberg) for providing KRNtg mice.

966 **Funding:** This work was supported by an intramural junior investigator fund of the Faculty of  
967 Medicine to PK (EQUIP - Funding for Medical Scientists, Faculty of Medicine, University of  
968 Freiburg), by the German Research foundation (DFG) (FOR2830 HE 2526/9-1) to HH, by the  
969 DFG research grant TRR130 to REV and the Ministry of Science, Research, and Arts Baden-  
970 Württemberg (Margarete von Wrangell Programm) to NC. **Competing interests:** The authors  
971 declare no financial and non-financial competing interests. **Data and materials availability:**  
972 All data associated with this study are present in the paper or Supplementary Materials.

973

#### 974 **Author contribution**

975 Conceived and designed the experiments: P.K., H.C., A.M-P., M.H.

976 Performed the experiments: P.K., H.C., M.H., A.M-P, U.S.

977 Analyzed the data: P.K., H.C., A.M-P, U.S.

978 Contributed/reagent/sample material: RE.V.

979 Writing and original draft preparation: P.K., H.C.

980 Review and editing: H.H., RE.V., P.K.

981

982 **Figures**

983

984 **Figure 1**

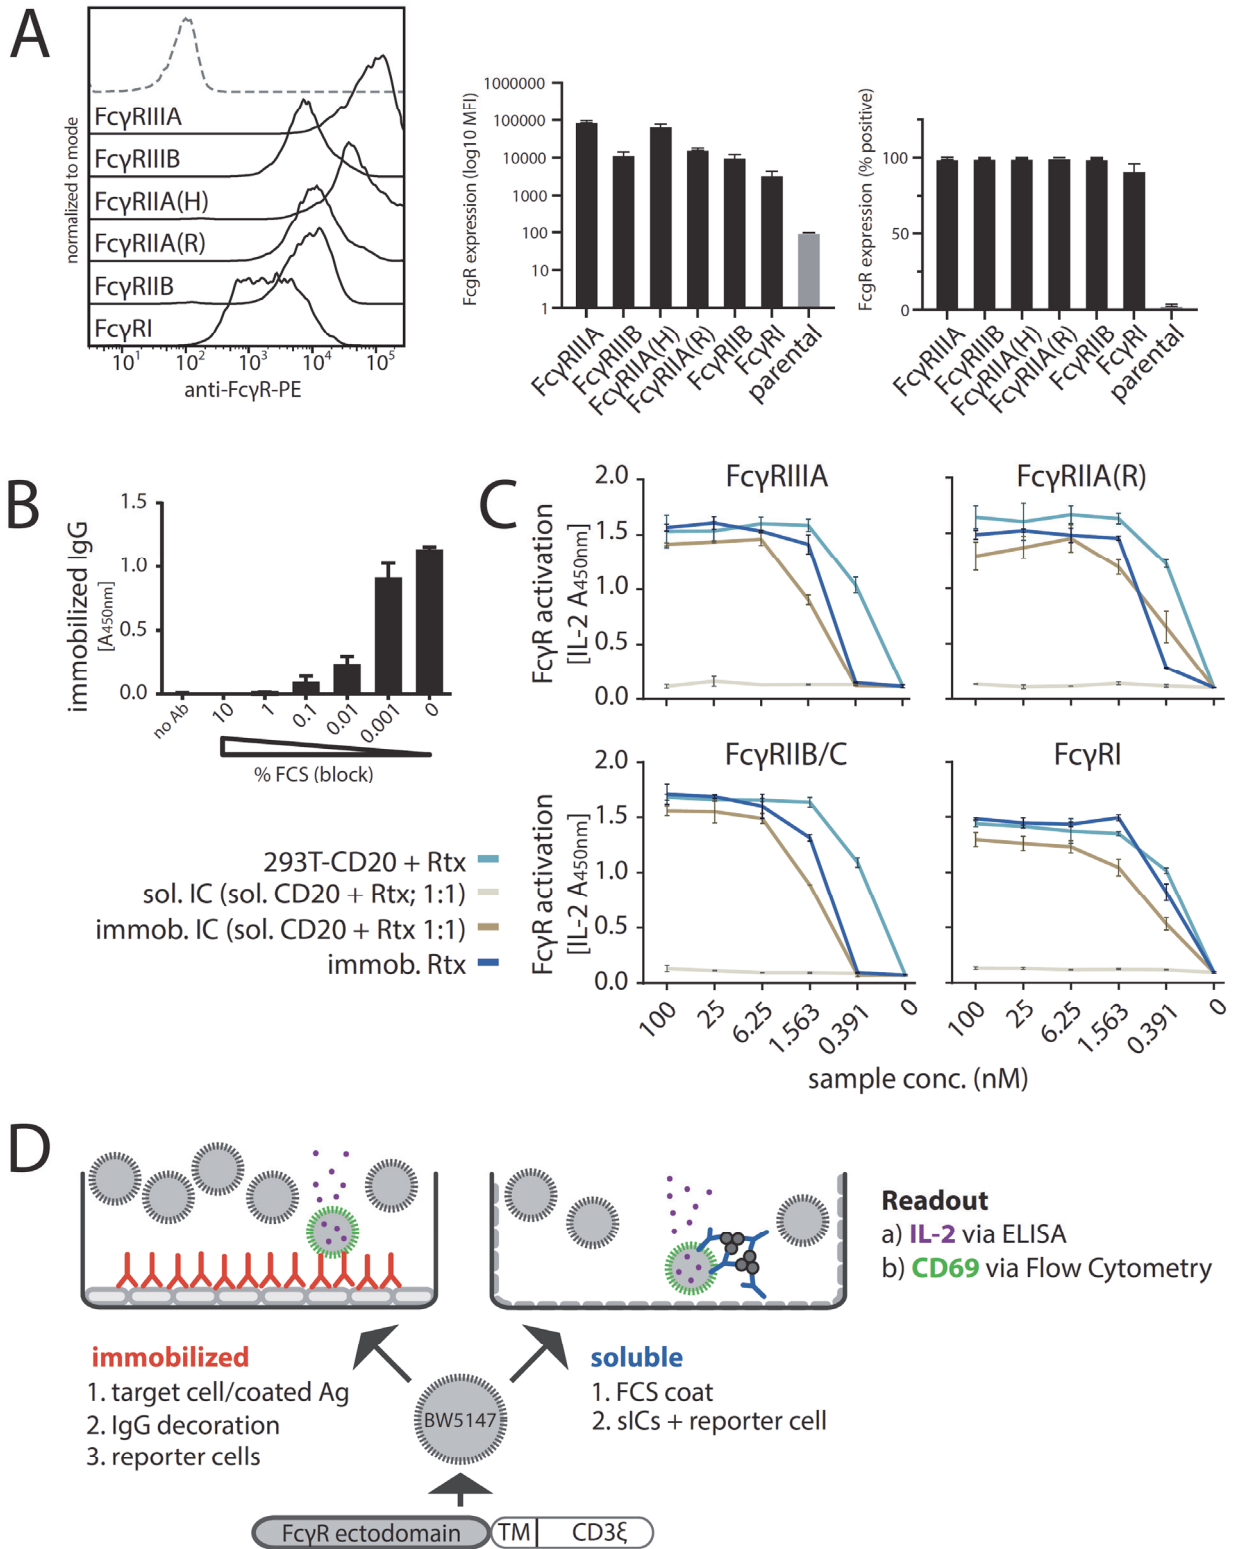

985

986

987 **Figure 2**

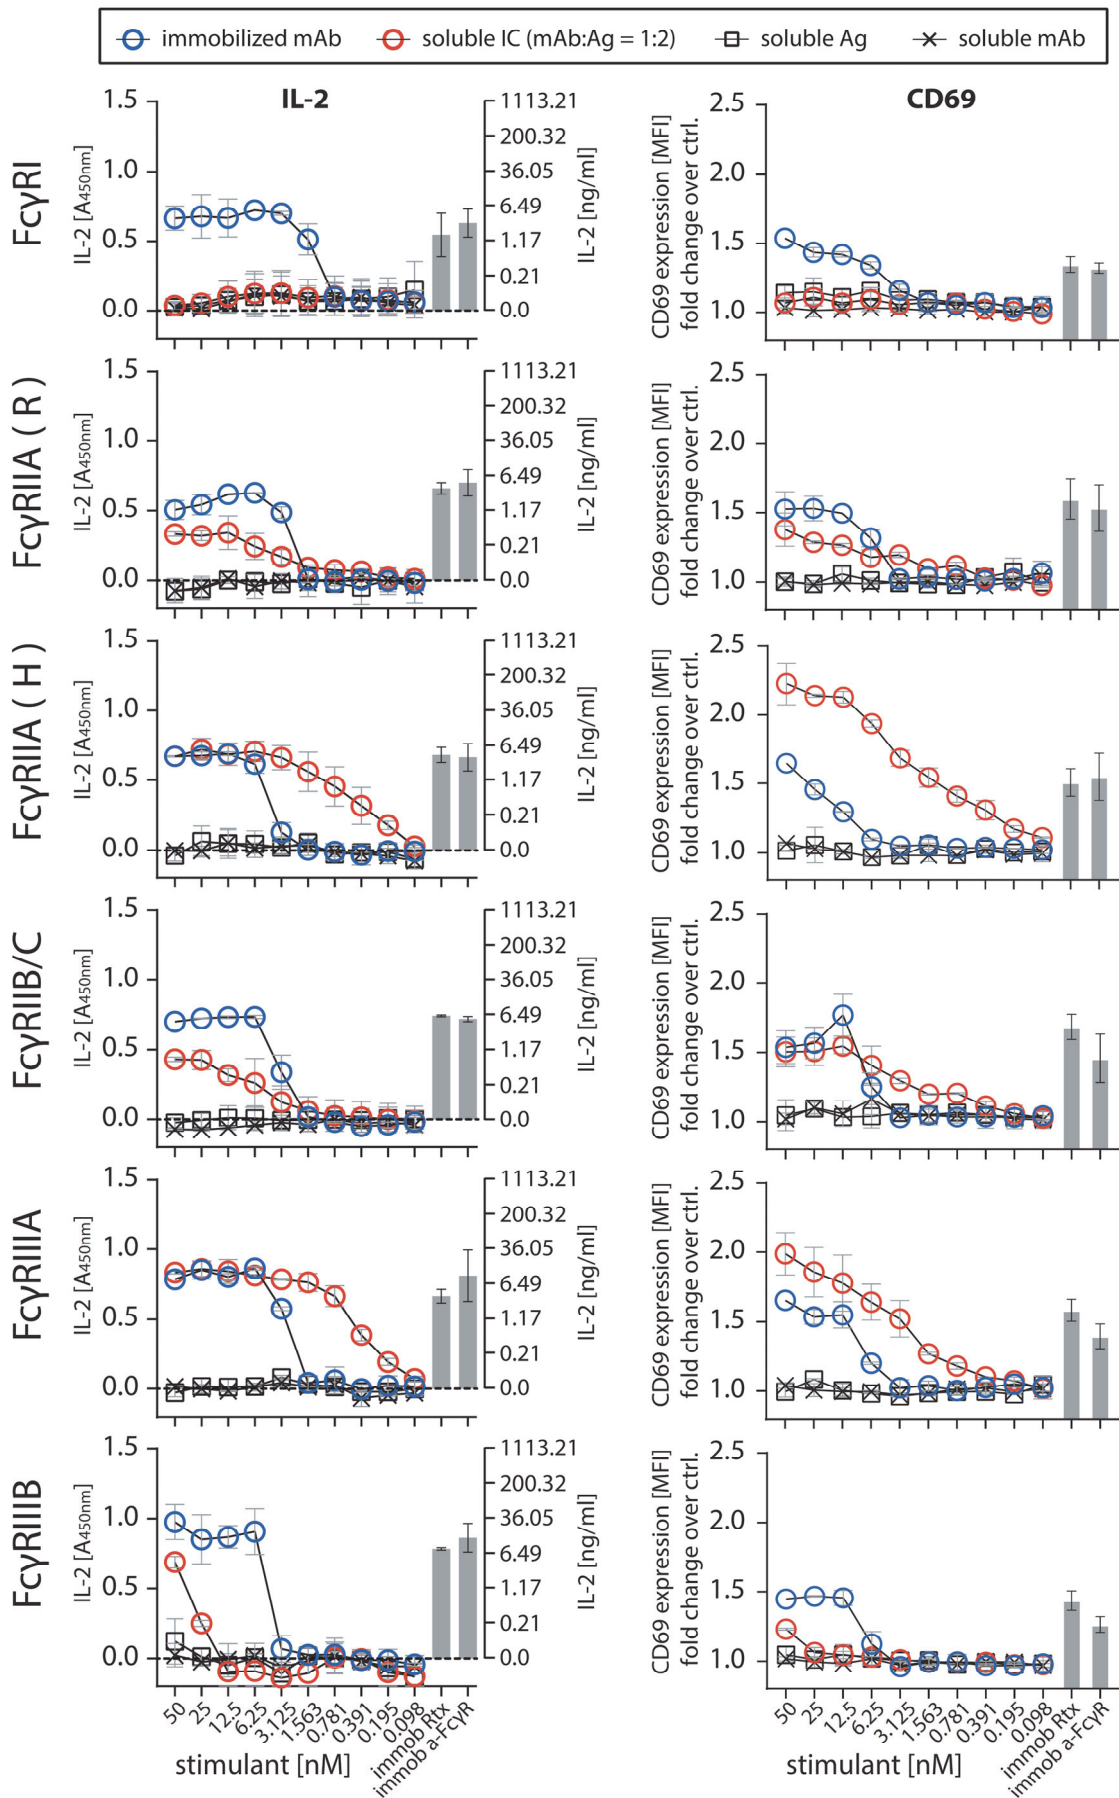

988

989 **Figure 3**

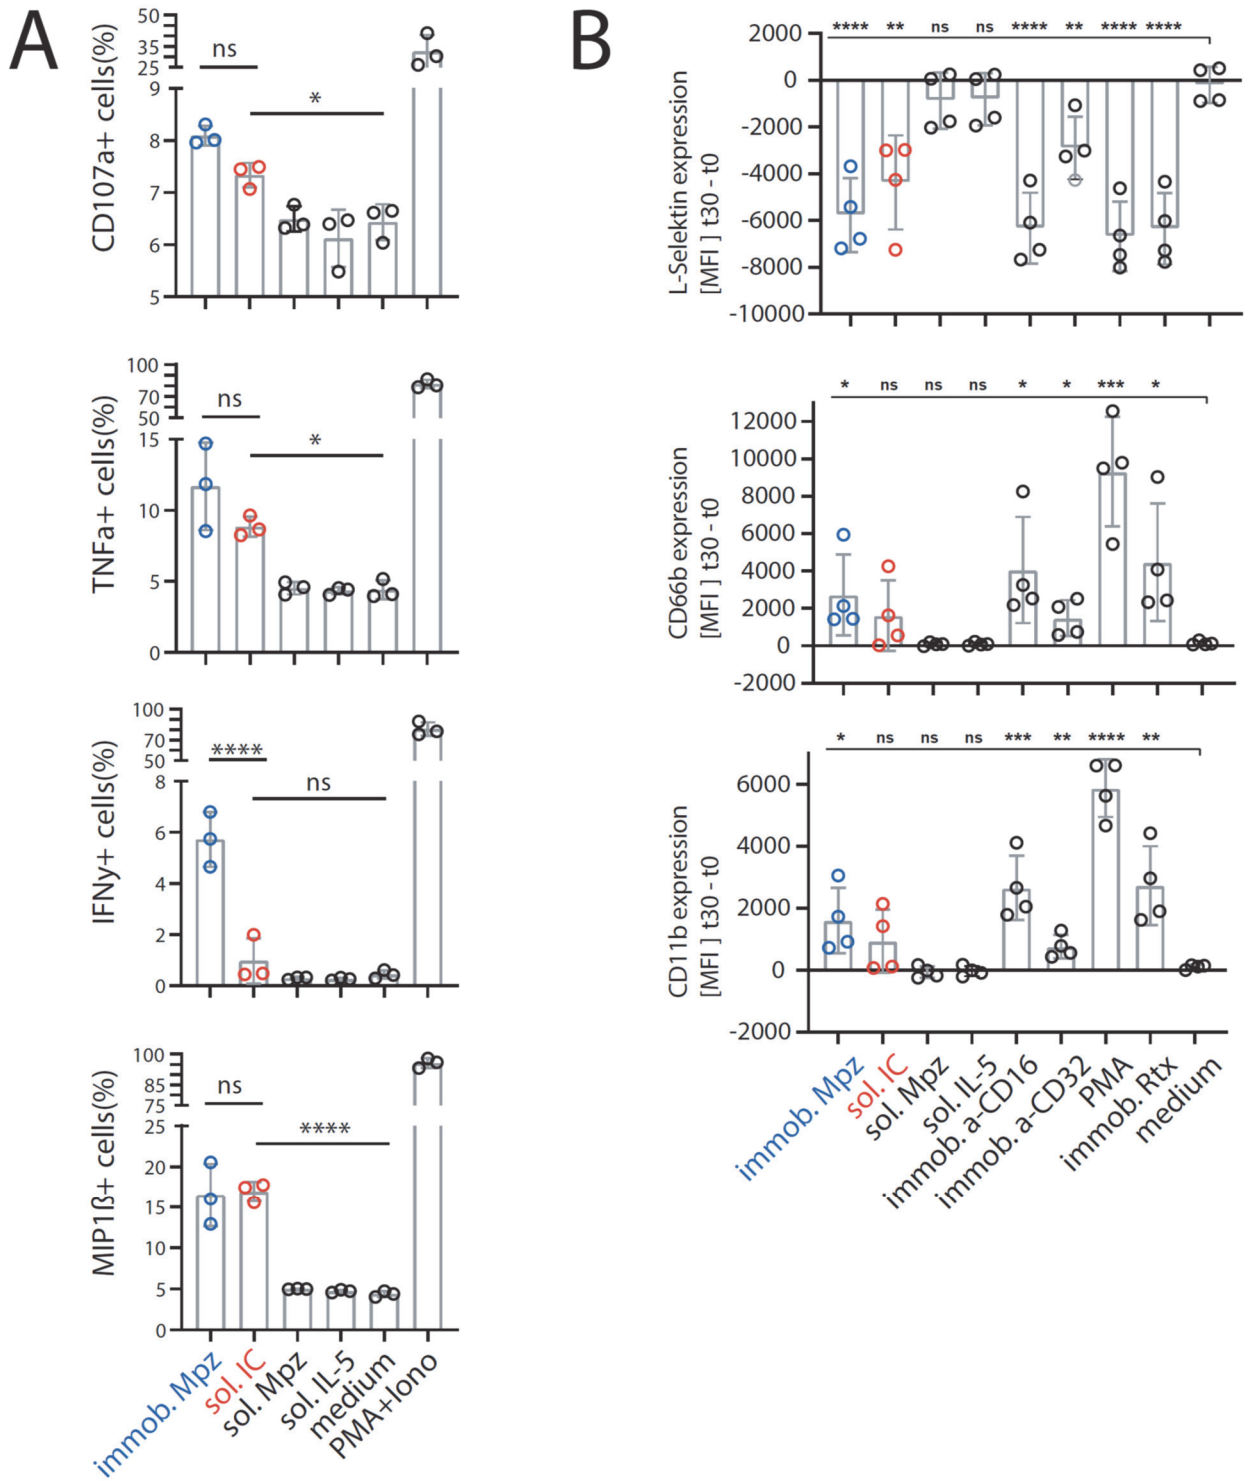

990

991

992

993 **Figure 4**

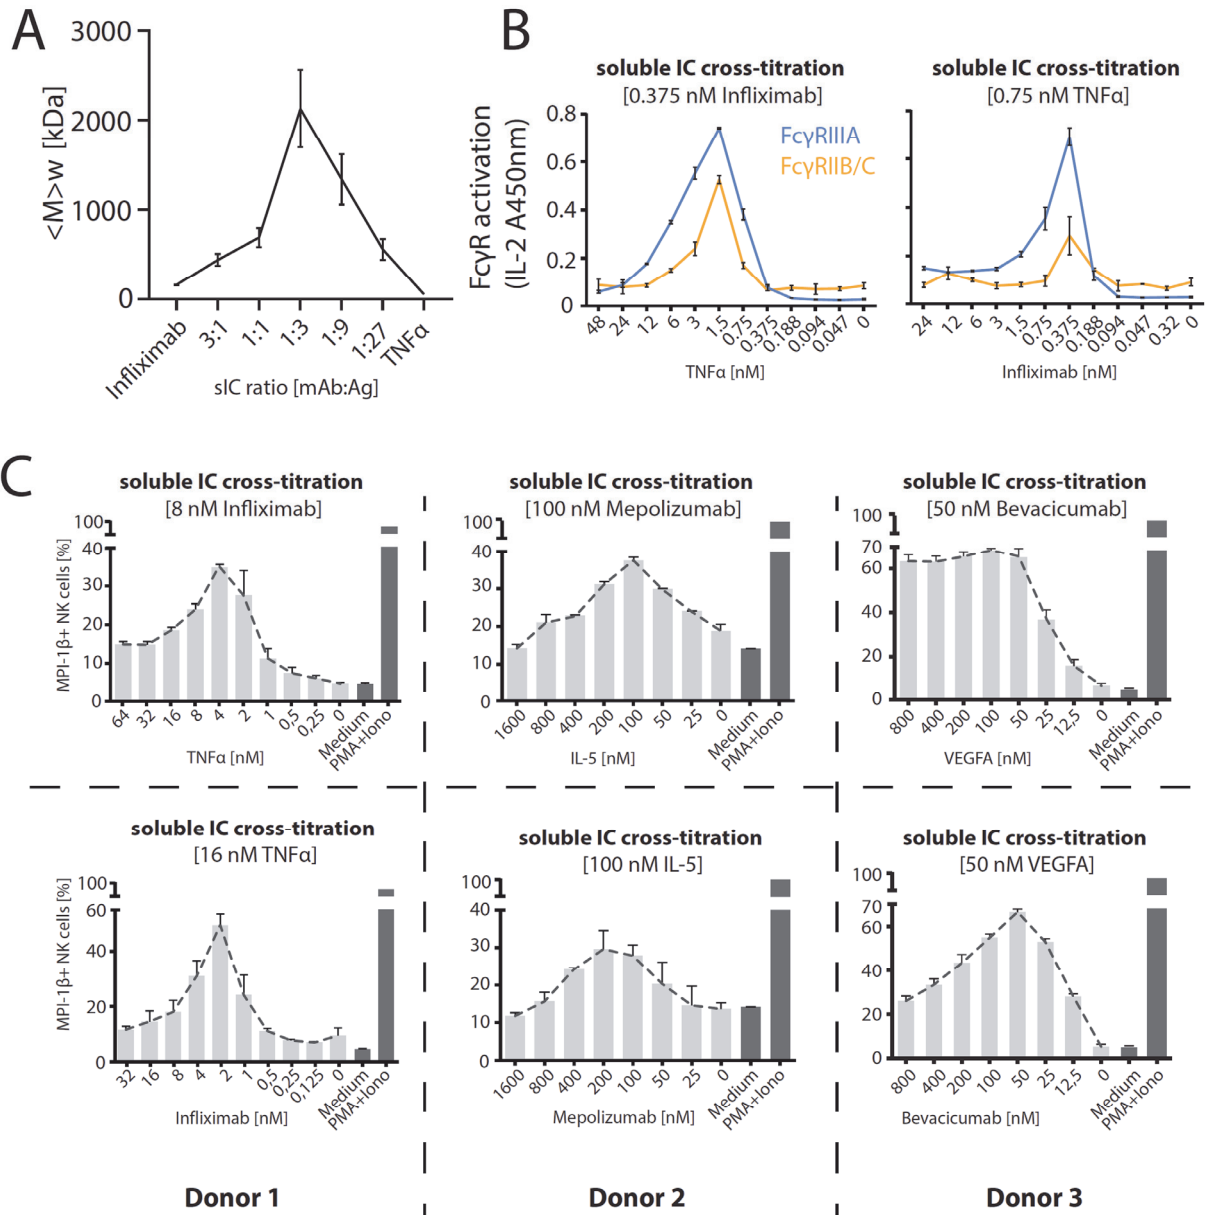

994

995

996

997 **Figure 5**

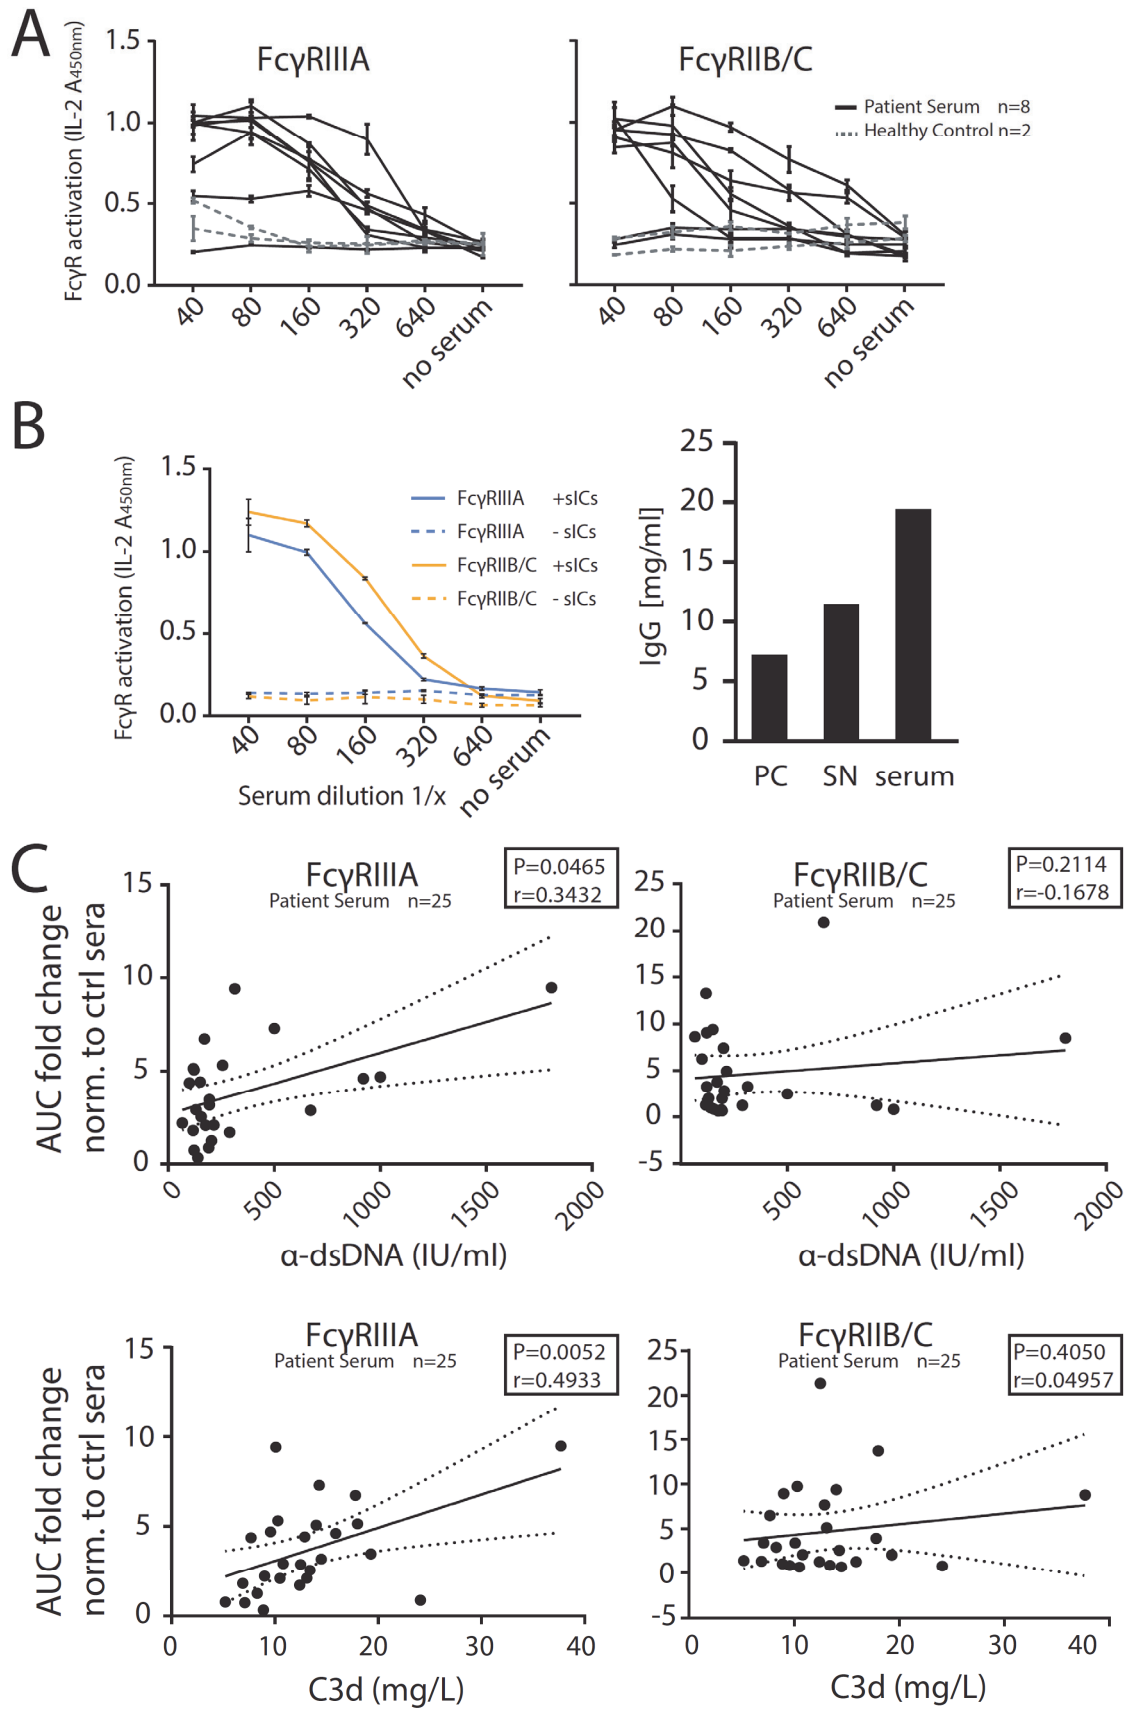

998

999 **Figure 6**

1000

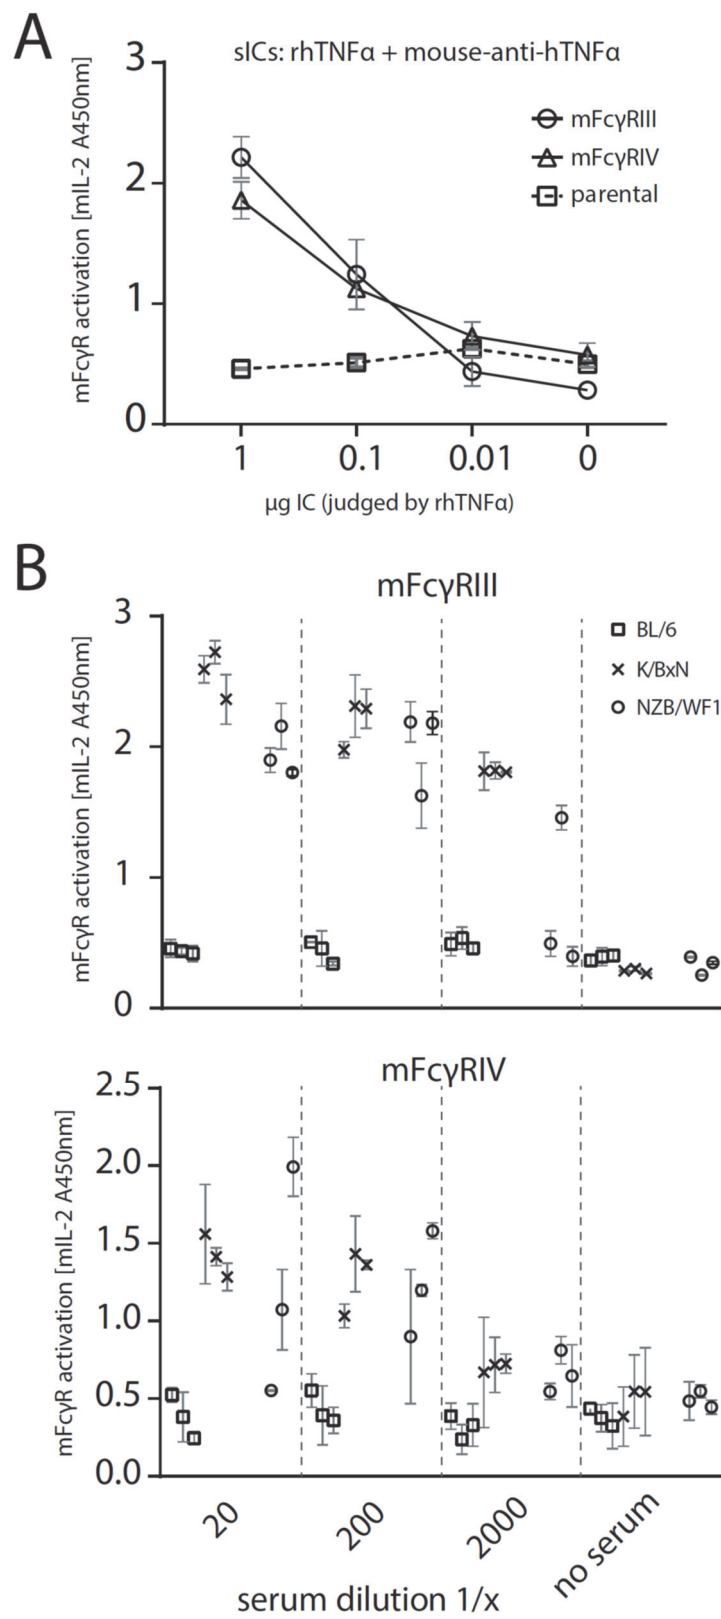

1001

1002

1003



1004 **Supplementary material**

1005

1006 **Figure S1**

1007

1008

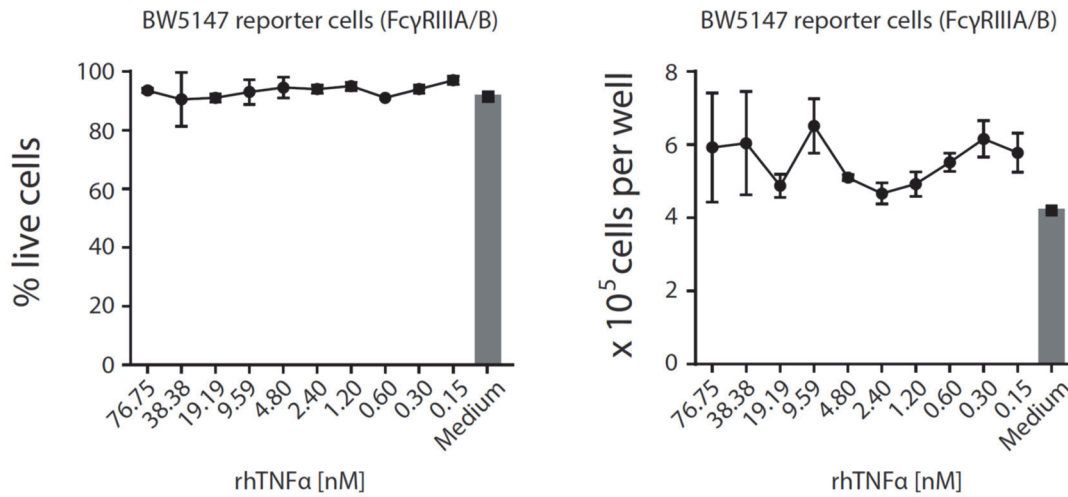

1009

1010 **Fig. S1. rhTNFα is not toxic to mouse lymphocyte BW5147 cells even at high**

1011 **concentrations.** Cell count and percentage of live cells were unaltered over a 16 h time frame

1012 of reporter cell culture in the presence of indicated rhTNFα concentrations and comparable to

1013 regular growth in complete medium. Experiments were conducted in 3 replicates. Error bars =

1014 SD.

1015



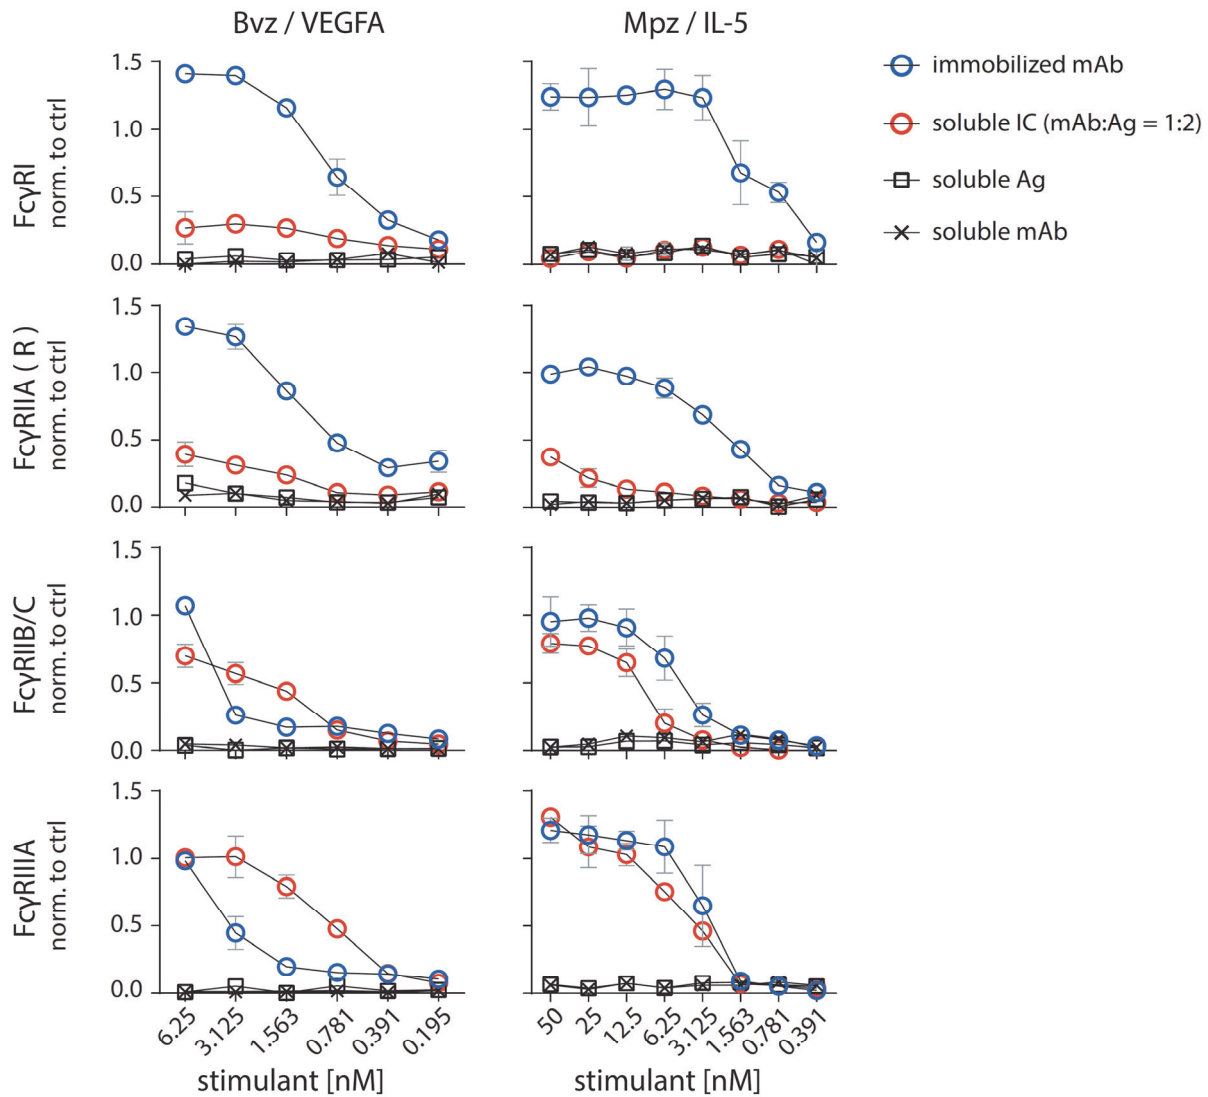

1016

1017 **Fig. S2. Fc $\gamma$ R<sub>s</sub> are activated by sICs formed from multivalent antigens.** Two different  
 1018 multivalent ultra-pure antigens (Ag) mixed with respective therapy-grade mAbs were used to  
 1019 generate sICs as indicated for each set of graphs (top to bottom). IC pairs: mepolizumab (Mpz)  
 1020 and rhIL-5; bevacizumab (Bvz) and rhVEGFA. X-Axis: concentrations of stimulant expressed  
 1021 as molarity of either mAb or Ag monomer and IC (expressed as mAb molarity) at a mAb:Ag  
 1022 ratio of 1:2. Soluble antigen or soluble antibody alone served as negative controls and were not  
 1023 sufficient to activate human Fc $\gamma$ R<sub>s</sub>. Fc $\gamma$ R responses were normalized to immobilized rituximab  
 1024 (Rtx) at 1  $\mu$ g/well (set to 1) and a medium control (set to 0). Two independent experiments  
 1025 performed in technical duplicates. Error bars = SD. Error bars smaller than symbols are not  
 1026 shown.

1027

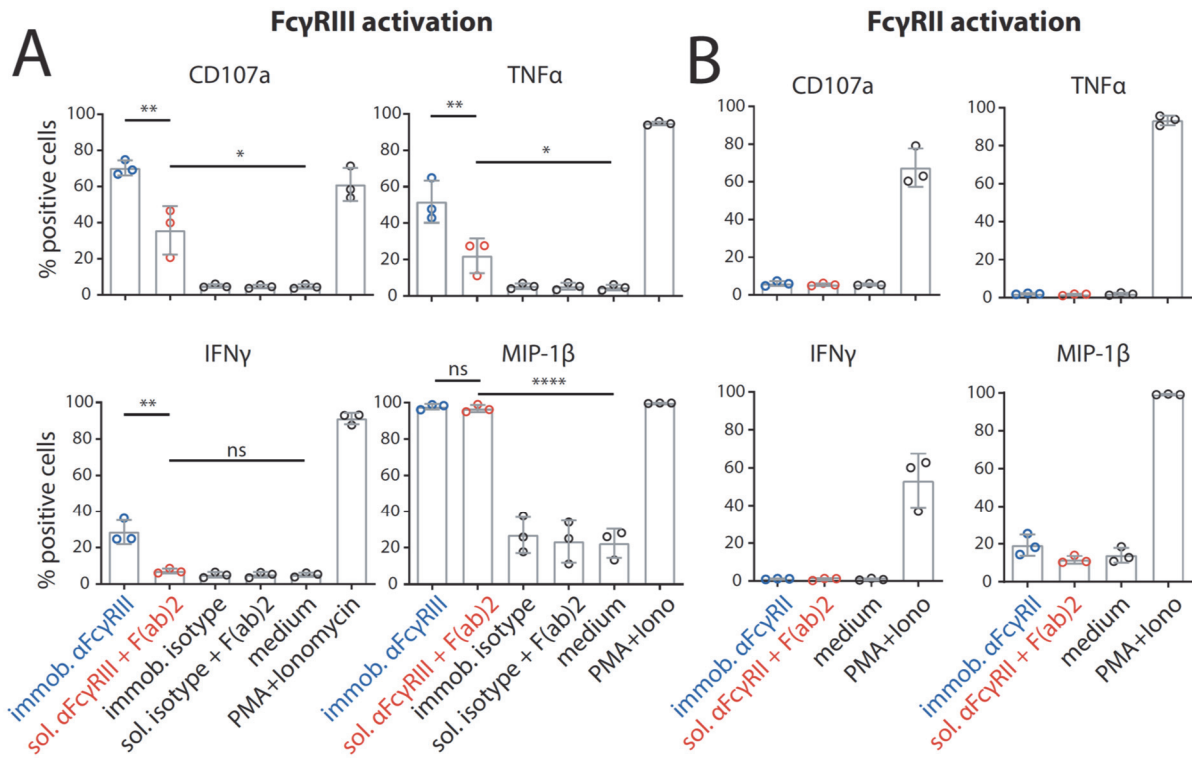

1028

1029 **Fig. S3. Distinct activation patterns of NK cells incubated with inverse sICs.** Negatively

1030 selected primary NK cells purified from PBMCs of three healthy donors were tested for NK

1031 cell activation markers. Error bars = SD. One-way ANOVA (Tukey); \* $p < 0.05$ , \*\* $p < 0.01$ ,

1032 \*\*\* $p < 0.001$ , \*\*\*\* $p < 0.0001$ . A) NK cells were incubated for 4 h with immobilized FcγRIII-

1033 specific mAb, soluble mouse-anti-human IgG F(ab)<sub>2</sub> complexed FcγRIII-specific mAb (reverse

1034 sICs), immobilized IgG of non-FcγRIII-specificity (isotype control) or soluble F(ab)<sub>2</sub>

1035 complexed isotype control (all at 1 μg, 10<sup>6</sup> cells). Incubation with PMA and Ionomycin served

1036 as a positive control. Incubation with medium alone served as a negative control. B) As in A

1037 using an FcγRII-specific mAb. NK cells from the tested donors in this study do not react to

1038 FcγRII activation.

1039 **Figure S4**

1040

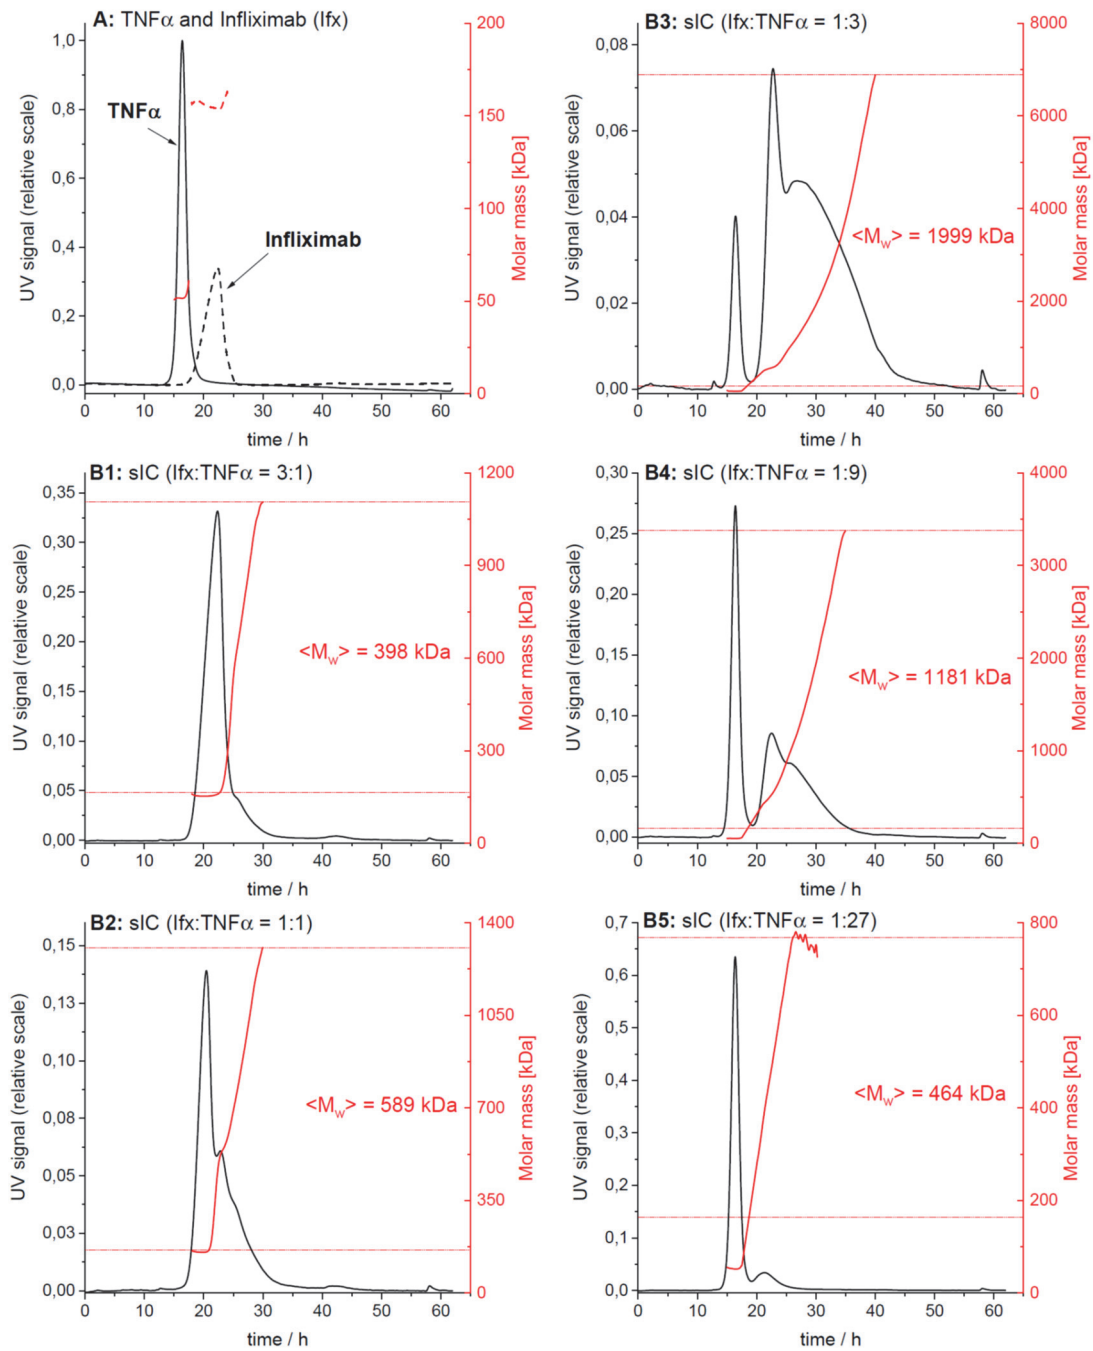

1041

1042

1043 **Fig. S4. AF4 elution profiles of Ixf/TNF $\alpha$ -immune complexes.**

1044 The elution profiles from one of three independent runs are shown. Protein concentration in the  
 1045 eluate is shown in black (UV signal at  $\lambda = 280$  nm, normalized to the highest UV signal found  
 1046 in this experiment), molar masses determined by MALS for a given retention time in red.  
 1047 Horizontal red lines indicate the range of molar masses used to calculate the mass-weighted  
 1048 mean of molar masses  $\langle M_w \rangle$ . A) Overlay of the elution profiles obtained for TNF $\alpha$  and Ixf,  
 1049 respectively; B1 to B5) Elution profiles for sICs formed after incubation of TNF $\alpha$  and Ixf at  
 1050 different molar ratios.

1051

1052 **Table S1**

| Sample           | Range of assigned molar masses [kDa] |                                    |                                    | Mass-weighted mean of assigned molar masses [kDa] |                              |                              |                                        |
|------------------|--------------------------------------|------------------------------------|------------------------------------|---------------------------------------------------|------------------------------|------------------------------|----------------------------------------|
|                  | Run 1                                | Run 2                              | Run 3                              | Run 1                                             | Run 2                        | Run 3                        | Mean $\pm$ SD                          |
| Infliximab, IFX  | 158 – 182                            | 153 – 164                          | 159 – 193                          | 162                                               | 156                          | 163                          | 160 $\pm$ 4                            |
| TNF -alpha       | 52 – 55                              | 51 – 61                            | 52 – 62                            | 52                                                | 52                           | 52                           | 52 $\pm$ 0                             |
| Immune complexes |                                      |                                    |                                    |                                                   |                              |                              |                                        |
| IFX/TNF 3:1      | 182 – 1.16 $\cdot$ 10 <sup>3</sup>   | 164 – 1.11 $\cdot$ 10 <sup>3</sup> | 193 – 1.10 $\cdot$ 10 <sup>3</sup> | 409                                               | 398                          | 518                          | 442 $\pm$ 66                           |
| IFX/TNF 1:1      | 182 – 2.06 $\cdot$ 10 <sup>3</sup>   | 164 – 1.31 $\cdot$ 10 <sup>3</sup> | 193 – 1.42 $\cdot$ 10 <sup>3</sup> | 801                                               | 589                          | 681                          | 690 $\pm$ 106                          |
| IFX/TNF 1:3      | 182 – 5.05 $\cdot$ 10 <sup>3</sup>   | 164 – 6.89 $\cdot$ 10 <sup>3</sup> | 193 – 10.8 $\cdot$ 10 <sup>3</sup> | 1.77 $\cdot$ 10 <sup>3</sup>                      | 2.00 $\cdot$ 10 <sup>3</sup> | 2.61 $\cdot$ 10 <sup>3</sup> | 2.13 $\cdot$ 10 <sup>3</sup> $\pm$ 435 |
| IFX/TNF 1:9      | 182 – 5.36 $\cdot$ 10 <sup>3</sup>   | 164 – 3.38 $\cdot$ 10 <sup>3</sup> | 193 – 3.51 $\cdot$ 10 <sup>3</sup> | 1.66 $\cdot$ 10 <sup>3</sup>                      | 1.18 $\cdot$ 10 <sup>3</sup> | 1.17 $\cdot$ 10 <sup>3</sup> | 1.34 $\cdot$ 10 <sup>3</sup> $\pm$ 279 |
| IFX/TNF 1:27     | 182 – 1.68 $\cdot$ 10 <sup>3</sup>   | 164 – 768                          | 193 – 1.01 $\cdot$ 10 <sup>3</sup> | 689                                               | 464                          | 521                          | 558 $\pm$ 117                          |

1053

1054 **Table S1. Analysis of the molar mass distribution of ICs from AF4 data.**

1055 For a given elution time, the AF4 profiles provide the concentration (UV) at which a given  
 1056 molar mass (MALS) of a protein is present in the sample. The molar mass distribution of Ixf,  
 1057 TNF $\alpha$  and their immune complexes (sICs) was obtained by plotting the cumulative frequency  
 1058 as a function of molar mass. For a selected range of molar masses, a mass-weighted mean value  
 1059 ( $\langle M_w \rangle$ ) was calculated. All detected molar masses were selected in the case of Ixf and TNF $\alpha$   
 1060 whereas only molar masses larger than the maximal molar mass found for Ixf were assigned to  
 1061 sICs. The table shows the range of assigned molar masses and the calculated  $\langle M_w \rangle$  for each  
 1062 AF4 run (n = 3).
